1                    **Biosynthetic proteins targeting the SARS-CoV-2 spike as anti-virals**

2  
3   Stéphanie Thébault<sup>1</sup>, Nathalie Lejal<sup>1</sup>, Alexis Dogliani<sup>2</sup>, Amélie Donchet<sup>1</sup>, Agathe Urvoas<sup>3</sup>,  
4   Marie Valerio-Lepiniec<sup>3</sup>, Muriel Lavie<sup>4</sup>, Cécile Baronti<sup>5</sup>, Franck Touret<sup>5</sup>, Bruno da Costa<sup>1</sup>,  
5   Clara Bourgon<sup>1</sup>, Audrey Fraysse<sup>1</sup>, Audrey Saint-Albin-Deliot<sup>1</sup>, Jessica Morel<sup>1</sup>, Bernard  
6   Klonjowski<sup>6</sup>, Xavier de Lamballerie<sup>5</sup>, Jean Dubuisson<sup>4</sup>, Alain Roussel<sup>2</sup>, Philippe Minard<sup>3</sup>,  
7   Sophie Le Poder<sup>6</sup>, Nicolas Meunier<sup>1</sup>, Bernard Delmas<sup>1</sup>

8  
9   <sup>1</sup> Unité de Virologie et Immunologie Moléculaires, INRAE, Université Paris-Saclay, 78350,  
10   Jouy-en-Josas, France

11   <sup>2</sup> Centre National de la Recherche Scientifique, Architecture et Fonction des Macromolécules  
12   Biologiques, UMR 7257, Marseille, France

13   <sup>3</sup> Université Paris-Saclay, CEA, CNRS, Institute for Integrative Biology of the Cell (I2BC),  
14   91198, Gif-sur-Yvette cedex, France

15   <sup>4</sup> Université Lille, CNRS, INSERM, CHU Lille, Institut Pasteur de Lille, U1019-UMR 9017-  
16   CIIL-Center for Infection and Immunity of Lille, Lille, France

17   <sup>5</sup> Unité des Virus Émergents (UVE), Aix Marseille Université, IRD 190, INSERM 1207,  
18   Marseille, France

19   <sup>6</sup> UMR Virologie, INRAE-ENVA-ANSES, École Nationale Vétérinaire d'Alfort, Université  
20   Paris-Est, Maisons-Alfort, 94704 Paris, France

21  
22   Corresponding author: Bernard Delmas

23   Mail: [bernard.delmas@inrae.fr](mailto:bernard.delmas@inrae.fr)

24  
25   Short title:  $\alpha$ Reps and SARS-CoV-2

26 **Abstract**

27 The binding of the SARS-CoV-2 spike to angiotensin-converting enzyme 2 (ACE2) promotes  
28 virus entry into the cell. Targeting this interaction represents a promising strategy to generate  
29 antivirals. By screening a phage-display library of biosynthetic protein sequences build on a  
30 rigid alpha-helicoidal HEAT-like scaffold (named  $\alpha$ Reps), we selected candidates recognizing  
31 the spike receptor binding domain (RBD). Two of them (F9 and C2) bind the RBD with  
32 affinities in the nM range, displaying neutralisation activity *in vitro* and recognizing distinct  
33 sites, F9 overlapping the ACE2 binding motif. The F9-C2 fusion protein and a trivalent  $\alpha$ Rep  
34 form (C2-foldon) display 0.1 nM affinities and EC<sub>50</sub> of 8-18 nM for neutralization of SARS-  
35 CoV-2. In hamsters, F9-C2 instillation in the nasal cavity before or during infections effectively  
36 reduced the replication of a SARS-CoV-2 strain harbouring the D614G mutation in the nasal  
37 epithelium. Furthermore, F9-C2 and/or C2-foldon effectively neutralized SARS-CoV-2  
38 variants (including delta and omicron variants) with EC<sub>50</sub> values ranging from 13 to 32 nM.  
39 With their high stability and their high potency against SARS-CoV-2 variants,  $\alpha$ Reps provide  
40 a promising tool for SARS-CoV-2 therapeutics to target the nasal cavity and mitigate virus  
41 dissemination in the proximal environment.

42 **Author Summary**

43 The entry of SARS-CoV-2 in permissive cells is mediated by the binding of its spike to  
44 angiotensin-converting enzyme 2 (ACE2) on the cell surface. To select ligands able to block  
45 this interaction, we screened a library of phages encoding artificial proteins (named  $\alpha$ Reps) for  
46 binding to its receptor binding domain (RBD). Two of them were able to bind the RBD with  
47 high affinity and block efficiently the virus entry in cultured cells. Assembled  $\alpha$ Reps through  
48 covalent or non-covalent linkages blocked virus entry at lower concentration than their  
49 precursors (with around 20-fold activity increase for a trimeric  $\alpha$ Rep). These  $\alpha$ Reps derivatives  
50 neutralize efficiently SARS-CoV-2  $\beta$ ,  $\gamma$ ,  $\delta$  and Omicron virus variants. Instillation of an  $\alpha$ Rep  
51 dimer in the nasal cavity effectively reduced virus replication in the hamster model of SARS-  
52 CoV-2 and pathogenicity.

53

## 54 **Introduction**

55 With up to 6 million deaths worldwide in less than two years, the COVID-19 crisis has  
56 demonstrated the necessity to better understand and fight the spread and transmission of  
57 respiratory viruses. Such knowledge will help to develop new efficient anti-viral strategies to  
58 mitigate future epidemics and pandemics. SARS-CoV-2 infection starts in the nasal cavity, the  
59 virus replicating at high titres in the olfactory epithelia before reaching the lower respiratory  
60 tract where it induces the main pathology [1]. Infection of the olfactory epithelium leads to  
61 massive damage which may explain the high prevalence of smell loss (anosmia) during the  
62 COVID-19 pandemic and to environmental dissemination to infect conspecifics [2],[3].  
63 Blocking virus multiplication with antivirals delivered in the nose and the upper respiratory  
64 tract might therefore allow therapeutic benefit and prophylactic protection.

65 Series of human neutralizing monoclonal IgG antibodies and nanobodies/VHH fused to a Fc  
66 IgG domain able to inhibit SARS-CoV-2 infection have been produced and tested for systemic  
67 treatments, but their efficacy by delivery in the nose may not be optimal, due to a poor stability  
68 in the nasal cavity environment. Their firmness upon nebulization and aerosolization will be  
69 also a main issue for their use as therapeutics. Furthermore, their large-scale production should  
70 be economically not affordable in eucaryotic systems and technically difficult to achieve in  
71 prokaryotes [4].

72 As an alternative approach to VHH and antibodies, a family of artificial proteins, named  $\alpha$ Rep,  
73 was designed to provide a hypervariable surface on  $\alpha$ Rep variants [5].  $\alpha$ Reps are thermostable  
74 proteins constituted by alpha-helicoidal HEAT-like repeats (31-amino acids long) commonly  
75 found in eukaryotes [6] and prokaryotes [7], including thermophiles. Sequences of homologs  
76 form a sharply contrasted sequence profile in which most positions are occupied by conserved  
77 amino acids whereas other positions appear highly variable generating a versatile binding  
78 surface (**Fig. 1**). A large  $\alpha$ Rep library has been assembled and was demonstrated on a wide

79 range of unrelated protein targets to be a generic source of tight and specific binders. Thus,  
80  $\alpha$ Reps were previously selected as interactors of HIV-1 nucleocapsid and to negatively interfere  
81 with virus maturation [8].

82 As for all coronaviruses, the SARS-CoV-2 spike (S) protein mediates virus entry to permissive  
83 cells. The S protein is a trimeric class 1 fusion protein that binds to its cell receptor, angiotensin  
84 converting enzyme 2 (ACE2), before undergoing a dramatic structural rearrangement to fuse  
85 the host-cell membrane with the viral membrane [9], [10]. Fusion is triggered when the S1  
86 subunit binds to a host-cell receptor via its receptor binding domain (RBD). In order to bind to  
87 the receptor, the RBD undergoes articulated movements that transiently expose or hide its  
88 surface associated to the binding to ACE2 [11]. The two states are referred to as the “down”  
89 and the “up” conformations, in which down corresponds to a state incompetent to receptor  
90 binding and up to a state allowing receptor recognition. Due to its key function in the virus  
91 cycle, the RBD represents a target to identify binders that block interaction with the host-cell  
92 receptor or movements of the RBD between the down to up conformations [12].

93 Most SARS-CoV-2 infected people presents serum neutralizing antibody activity against the  
94 RBD indicating its immunodominance [13]. To reduce antibody binding, the viral evolution  
95 has led to the appearance of specific escape mutations in the RBD making current antibody-  
96 based treatments rapidly less effective [14].

97 Here, we first obtained a series of  $\alpha$ Reps specific of the receptor binding domain of the spike  
98 of SARS-CoV-2. These ligands display high affinities and blocked SARS-CoV-2 infection *in*  
99 *vitro*. The assembly of  $\alpha$ Rep through covalent and non-covalent linkages lowers the  
100 neutralisation EC50 to the 10 nM range. The  $\alpha$ Rep F9-C2 fusion protein instilled in the nose  
101 was found to limit virus replication and inflammatory response in a hamster model of SARS-  
102 CoV-2 infection. Furthermore, the F9-C2 fusion protein and a C2 homotrimer were found as  
103 potent inhibitors of SARS-CoV-2 variants including the antigenically distant omicron variant.

## 104 **Results**

### 105 **Selection of $\alpha$ Reps binders of the SARS-CoV-2 receptor binding domain**

106 An overview of the selection process to generate anti-SARS-CoV-2  $\alpha$ Reps specific of the spike  
107 is shown in **Fig. 1**. In order to select binders blocking SARS-CoV-2 entry into cells, the RBD  
108 (amino acids 330 to 550 of the spike S sequence) was used as a bait for screening. The phage  
109 display procedure included three rounds of panning followed by a screening step by phage-  
110 ELISA on individual clones. Nucleotide sequencing allowed the identification of >20  
111 independent clones that were retained for further analyses (selected  $\alpha$ Rep sequences are listed  
112 in **Fig. S1**). His-tagged versions of the anti-RBD  $\alpha$ Rep were expressed in *E. coli* and purified.  
113 We first explored their affinity for the RBD by biolayer interferometry (BLI) at different  
114 concentrations to determine their kinetic rate constants. **Fig. 2** shows the binding of two most  
115 potent anti-RBD ligands,  $\alpha$ Reps C2 and F9. Their affinity for the RBD was about 0.3 and 1.1  
116 nM, respectively.  $\alpha$ Rep C7 exhibited an affinity in the 10 nM range.

117

### 118 **Identification of neutralizing $\alpha$ Reps**

119 We next tested the neutralization activity of the best  $\alpha$ REPs candidates against SARS-CoV-2  
120 pseudotyped murine leukemia virions (MLV) as previously described [15]; **Fig. 2C**]. These  
121 virions only contain the SARS-CoV-2 spike protein on their surface and behave like their native  
122 coronavirus counterparts for entry in cells expressing ACE2. Upon cell entry, the luciferase  
123 reporter gets integrated into the host cell genome and is expressed, the measured signal being  
124 correlated with  $\alpha$ Rep neutralization properties. C2, F9 and C7 showed a dose-dependent  
125 neutralization activity, C2 displaying the highest neutralisation activity. Neither G1, an  
126 additional selected anti-RBD  $\alpha$ Rep, nor an anti-influenza  $\alpha$ REP (H7), used as negative control,  
127 displayed notable neutralization activity. None of the  $\alpha$ Reps tested at the highest concentration

128 (3  $\mu\text{M}$ ) displayed neutralization activity against vesicular stomatitis virus G pseudo-typed  
129 MLV, demonstrating their specificity.

130 We confirmed this neutralization activity using SARS-CoV-2 infection of Vero E6 cells (**Fig.**  
131 **2D**). C2 showed the highest neutralizing potency with a half-maximal inhibitory concentration  
132 ( $\text{IC}_{50}$ ) value of 0.1  $\mu\text{M}$ , while C7 and F9  $\alpha\text{Reps}$  displayed  $\text{IC}_{50}$  values of 4.8 and 11.7  $\mu\text{M}$ ,  
133 respectively (**Fig. 2E**). G1 as well as the anti-influenza H7  $\alpha\text{Rep}$  did not show neutralization  
134 activity. We thus identified three potent neutralizing  $\alpha\text{Reps}$ , with C2 and F9 displaying affinity  
135 in the nM range. These two last  $\alpha\text{Reps}$  were retained for further analyses.

136

### 137 **Design of $\alpha\text{REP}$ derivatives**

138 In order to increase avidity and neutralization activity of these RBD binders, we aimed at  
139 generating multivalent  $\alpha\text{Reps}$ . We first determined if F9 and C2 recognized non-overlapping  
140 binding sites on the RBD to assess their interest to be linked in a fusion protein. Competitive  
141 binding assays carried out by BLI showed that C2 and F9 bindings on the RBD did not interfere  
142 in a reciprocal manner (**Fig. 3A and 3B**). Competitive binding assays between these two  $\alpha\text{Reps}$   
143 and soluble hACE2 showed that ACE2 binding occurred efficiently after binding of C2 on the  
144 RBD. In contrast, binding of F9 on the RBD partially inhibited recognition of hACE2. As a  
145 positive control, VHH72 recognizing the receptor binding motif [16] fully blocked hACE2  
146 binding on the RBD (**Fig. 3C**). These results suggest that the neutralization activity of the C2  
147  $\alpha\text{Rep}$  is not associated to a steric inhibition of the binding of the RBD on ACE2, and that a  
148 fusion between C2 and F9  $\alpha\text{Reps}$  may be synergistic. We thus engineered bivalent  $\alpha\text{Reps}$   
149 constructs using F9 and C2  $\alpha\text{Reps}$ . We also generated trivalent  $\alpha\text{Reps}$  through the addition of  
150 a trimerization foldon domain (corresponding to the C-terminal part of T4 fibrin) behind C2  
151 and F9  $\alpha\text{Reps}$  [17].

152

## 153 **Properties of $\alpha$ REP heterodimers and homotrimers**

154 To build the F9-C2 and C2-F9 heterodimers, we inserted a 25 amino acid long flexible linker  
155 (GGGGS)<sub>5</sub> between these two subunits (**Fig. S1**). This linker length (that can reach 8 nm in  
156 length) allows the binding of these heterodimers between adjacent RBDs in the trimer, even in  
157 the “up” to “down” spike conformers. To generate the homotrimeric C2- and F9-foldon  $\alpha$ Reps,  
158 the foldon sequence was connected to the C-ter of the  $\alpha$ REPs through a 16-amino acid long  
159 linker (GSAGSAGGSGGAGGSG) (**Fig S1**). These linkers would allow cross-links between  
160 spikes at the surface of the virus particle. Unable to express efficiently the C2-F9 construct,  
161 only the F9-C2 affinity was characterized by BLI experiments (**Fig. 4A**). F9-C2 displayed an  
162 equilibrium dissociation constant ( $K_D$ ) of 91 pM, at least three folds better than that of  
163 monomers. F9-C2 also showed a substantially slowed dissociation rate constant of  $5.86 \times 10^{-5}$   
164 s<sup>-1</sup> owing to enhanced avidity. Circular dichroism revealed melting temperatures of 86.5°,  
165 88.3° and 86.0°C for C2, F9 and F9-C2, respectively, confirming the high stability of this class  
166 of protein (**Fig. S2**).

167 We next investigated the ability of F9-C2 to block RBD-ACE2 interaction by BLI  
168 measurements (**Fig. 3C**). When F9-C2 was bound to the RBD, addition of ACE2 induced no  
169 signal shift demonstrating that F9-C2 dimer is a potent inhibitor of spike binding to ACE2,  
170 similarly to the VHH72 [16].

171 We next explored the neutralization activity of F9-C2 and C2- and F9-foldon for comparison  
172 with their parental subunits against SARS-CoV-2 spike pseudo-typed MLV (**Fig. 4B**). A  
173 synergic effect in neutralisation efficiency was evidenced when the F9 and C2 subunits were  
174 covalently linked and when C2 was assembled as a homotrimer. While C2 almost fully blocked  
175 entry of SARS-CoV-2 pseudo-type at a concentration of 250 nM, F9-C2 and C2-foldon  
176 neutralized infection at 50 nM. We next investigated their viral neutralization potencies in  
177 SARS-CoV-2 / Vero E6 cell infection assays by measuring cell viability (**Fig. 4C**) and viral



178 replication (**Fig. 4D**). F9-C2 and C2-foldon were more effective than their monomeric  
179 counterparts to protect cells from SARS-CoV-2 infection, with an IC<sub>50</sub> of 12 nM and 3 nM,  
180 respectively, while C2 alone neutralized SARS-CoV-2 with an IC<sub>50</sub> of 77 nM. F9-foldon  
181 displayed a similar activity than its monomeric counterpart indicating no added value of this  
182 construction. Quantification of virus replication confirmed the same trend, with an EC<sub>50</sub> of 18  
183 nM for F9-C2 and 8 nM for C2-foldon, indicating a higher neutralizing activity than C2 (EC<sub>50</sub>  
184 of 128 nM).

185 Thus, the covalent linkage between the F9 and C2 subunits or the trimerization of C2 revealed  
186 a synergistic effect (~x 10-25) of  $\alpha$ REPs oligomerization to neutralize SARS-CoV-2. Since F9-  
187 C2 targeted two different epitopes and may be less sensible to spike antigenic shift, we retained  
188 this heterodimer for further *in vivo* analyses.

189

#### 190 **F9-C2 prophylaxis limits SARS-CoV-2 infection *in vivo***

191 In order to evaluate if F9-C2 prophylaxis was effective to limit SARS-CoV-2 infection *in vivo*,  
192 we used Syrian golden hamsters known to reflect the infection in human [18]. We focused on  
193 the nasal cavity as we choose to examine how a local treatment could limit the start of the  
194 infection in a physiological context. We pre-treated the hamsters with 0.6 mg of F9-C2  
195 distributed between the two nostrils 1h prior to infection with 5.10<sup>3</sup> TCID<sub>50</sub> of SARS-CoV-2 of  
196 the circulating European strain in 2020 (harbouring the D614G mutation in the spike protein)  
197 (**Fig. 5A**). After such treatment, we observed the presence of infiltrated  $\alpha$ Reps on the surface  
198 of the epithelium layer, indicating an efficient absorption of the molecule (**Fig. S3**). The group  
199 treated with the non-neutralizing  $\alpha$ REP G1 lose weight starting from day 2. Treatment with F9-  
200 C2 limited weight loss and the difference with G1 treatment almost reach significance at 3 dpi  
201 (P=0.057, 2-way ANOVA, **Fig. 5B**). During the 3 days following infection, virus titres in nasal  
202 swabs were lower in the group treated with F9-C2 than in the G1-treated group (**Fig. 5C**, two-

203 way ANOVA,  $P < 0.0001$ ). In the olfactory turbinates where virus starts to replicate at high titres,  
204 amount of viral RNA was significantly lower at 1 dpi in F9-C2 treated animals (Mann Whitney,  
205  $P = 0.0286$ , **Fig. 5D**), consistent with a tendency of lower expression of inflammation markers,  
206 in particular IL-6 and TNF $\alpha$ . At 3 dpi, no significant differences were observed for viral RNA  
207 and inflammation markers between the two treatments. Next, we examined if the lower amount  
208 of viral RNA at 1 dpi in the nasal cavity of F9-C2-treated animals was reflected at the  
209 histological level. While the virus was present in large patches of the epithelium in the G1-  
210 treated animals, it was only present in small stretches in F9-C2-treated animals (**Fig. 5E**). We  
211 measured the infected area in the rostral part of the nasal cavity at 1 dpi where the infection  
212 starts. The difference between G1 and F9-C2 treated animals was close to significance (Mann  
213 Whitney,  $P = 0.057$ , **Fig. 5F**).

214

### 215 **Repeated F9-C2 treatments further limit SARS-CoV-2 infection *in vivo***

216 In order to improve the efficiency of the treatment, hamsters were treated with F9-C2 (0.6 mg  
217 per dose) 1h prior infection and on days 1 and 2 post-infection (**Fig. 6A**). F9-C2 treatments  
218 limited weight loss and the difference reach significance at 3 dpi when compared to controls  
219 ( $P = 0.015$ , 2-way ANOVA, **Fig. 6B**). During the 3 days post-infection, virus titres in nasal  
220 swabs were lower in the group treated with F9-C2 than in the control group (**Fig. 6C**, two-way  
221 ANOVA,  $P < 0.0001$ ). Viral RNA was significantly lower in olfactory turbinates at 1 dpi and 3  
222 dpi in F9-C2 treated animals (Mann Whitney,  $P = 0.0286$ , **Fig. 6D**) when compared to an  
223 irrelevant  $\alpha$ Rep. This observation correlates with lower expression of inflammation markers  
224 (IL-6, TNF $\alpha$  and Ncf2, the last one being related to neutrophil infiltration). We observed less  
225 damage of the olfactory epithelium accompanied with a reduction of immune cell infiltration  
226 (revealed by the iba1<sup>+</sup> marker) and desquamated cells in the lumen of the nasal cavity for  
227 animals treated by F9-C2, especially at 1 dpi (**Fig. 6E** and **Fig. S4**). The infected area in the

228 rostral part of the nasal cavity at 1 dpi was significantly reduced in F9-C2 treated animals  
229 compared to controls (Mann Whitney,  $P=0.0286$ , **Fig. 6F**). These results suggested that  
230 repeated injections of F9-C2 significantly reduce the spread of the virus up to 3 days post-  
231 infection.

232

### 233 **$\alpha$ REP derivatives neutralize numerous SARS-CoV-2 variants**

234 We next explored the ability of F9-C2 and C2-foldon to neutralize pseudo-types and SARS-  
235 CoV-2 variants. To this end, we first generated five different SARS-CoV-2 S pseudo-typed  
236 MLV carrying the RBD mutations specific of each of the  $\alpha$ ,  $\beta$ ,  $\gamma$ ,  $\delta$  and o variants [19] (**Fig.7A**).  
237 In all cases, F9-C2 and C2-foldon appeared to synergise the neutralisation activities of their  
238 monomeric counterparts. They inhibited the pseudo-types representatives of the  $\alpha$ ,  $\beta$ ,  $\gamma$  and o  
239 variants entry as efficiently as the parental pseudo-type (with an almost full neutralization of  
240 pseudo-typed particles at 100 nM). In contrast,  $\kappa$  /  $\delta$  like-variant entry was only 90%- and 70%-  
241 blocked by F9-C2 and C2-foldon at a concentration of 500 nM. Furthermore, C2-foldon  
242 exhibited a similar activity against variants than F9-C2. Figure7B shows the neutralizing  
243 potencies of F9-C2 and C2-foldon against authentic virus variants by viral RNA quantification.  
244 C2-foldon neutralized efficiently  $\beta$ ,  $\gamma$ ,  $\delta$  and o virus variants (with  $EC_{50}$  ranging from 13 to 32  
245 nM)(Fig. 7C). F9-C2 exhibited similar neutralization activities, except for the  $\delta$  variant (with  
246 an  $EC_{50} >184$  nM). As expected, their monomeric counterparts displayed lower specific  
247 activities (with  $EC_{50} > 283$  nM).

248

### 249 **Discussion**

250 From the beginning of the COVID-19 pandemic, numerous studies reported the selection of  
251 monoclonal antibodies or nanobodies targeting the SARS-CoV-2 RBD [12] with the aim to  
252 block RBD-ACE2 interaction and consequently virus entry in permissive epithelial cells [20],

253 [21]. Although high-affinity antibodies have been prioritized as potential therapeutics, they are  
254 expensive to produce in mammalian cell expression systems and they must be injected rather  
255 taken orally or by spray [22]. Usually, large doses are required because only a small proportion  
256 may cross the epithelial cell barrier lining the airways. Nanobodies represent an interesting  
257 alternative to antibodies since they are easy to produce in bacteria or yeast. However, their  
258 stability due to structural constraints (the existence of an internal disulfide bridge) in external  
259 body compartments may represent a bottleneck for their industrial production and prevent their  
260 aerosolization use. In this study, we aimed at producing stable antivirals that could be easily  
261 adapted against SARS-CoV-2 variants at low cost.

262 We used a phage display screening of a library encoding artificial proteins, named  $\alpha$ Reps, to  
263 identify ligands targeting the spike RBD of SARS-CoV-2. Two of them (C2 and F9  $\alpha$ Reps)  
264 displayed affinity in the nM range. Competitive binding assays showed that these last molecules  
265 were able to neutralize the virus through different mechanisms, with C2 binding a site distant  
266 of the receptor binding motif to ACE2, in contrast to F9 that compete with ACE2 for binding  
267 on RBD. We demonstrated the simplicity of  $\alpha$ Rep bioengineering to increase the neutralization  
268 activity with a multivalent form. The F9-C2 heterodimer and the homotrimeric C2-foldon  
269 displayed higher SARS-CoV-2 neutralization activity than the two parental  $\alpha$ Reps, with  $IC_{50}$   
270 of 3 to 12 nM. We explored if nasal instillation of F9-C2 could effectively limit SARS-CoV-2  
271 infection in a hamster model. Such treatment induced a reduction of the virus load in nasal  
272 swabs and in the nasal cavity (the primary replication site of SARS-CoV-2), as well as a decline  
273 of all the inflammation markers of infection.

274 Blocking SARS-CoV-2 contamination chains represents a main issue to control Covid-19  
275 pandemic. As the treatment was not sufficient to fully block infection in the nasal cavity, we  
276 anticipate that optimisation of the  $\alpha$ Rep delivery through nebulisation or aerosolization, and  
277 using adequate carriers, may increase their efficiency. Indeed, nebulization of a trivalent

278 nanobody improved their effectiveness to reduce the RSV load in nasal swabs in children  
279 hospitalized for lower respiratory tract infection [23]. The use of drugs such as  $\alpha$ Reps derivatives  
280 or other low-cost antivirals in infected people and contact cases could thus be helpful to block  
281 SARS-CoV-2 diffusion in conspecifics.

282 F9-C2 and C2-foldon resulted in efficient neutralization of a wide variety of SARS-CoV-2  
283 variants ( $\alpha$ ,  $\beta$ ,  $\gamma$ ,  $\delta/\kappa$  and omicron variants), a feature that may result from the intrinsic high  
284 affinity of the  $\alpha$ Rep subunits for the RBD and their multimerization that allow a less  
285 dependence to amino acid substitutions in the target. Current antibody-based therapeutics  
286 strategies are being jeopardized by the continuous emergence of SARS-CoV-2 variants through  
287 potential loss of binding and neutralization activity [13]. Combining  $\alpha$ Reps subunits in  
288 multivalent forms could thus represent a real option to treat emerging variants.

289 Beside the fact that  $\alpha$ Reps assemblies can be easily engineered, i.e. easily associated by linkers  
290 or multimerized to generate avidity on targets of interest, these proteins have also favorable  
291 biophysical properties of production, purification and stability and can be very efficiently  
292 produced (20 mg of purified protein C2, F9, F9-C2 and C2-foldon per liter of bacterial culture)  
293 by recombinant protein expression technologies in bacteria. They are particularly robust, highly  
294 thermostable and can be stored at room temperature, which is a significant advantage for further  
295 therapeutic developments.

296 Immunogenicity of the  $\alpha$ Reps is a potential problem that should be addressed in the future, but  
297 their relatively small size (the C2  $\alpha$ Rep is 18.5 kDa), their association through flexible linkers  
298 and their high solubility and stability may result in low immunogenic activity and may not  
299 induce adverse undesirable effects when delivered in the nasal cavity.

300 To conclude, we selected artificial proteins ( $\alpha$ Reps) as specific and versatile neutralizing  
301 binders targeting the spike of SARS-CoV-2. These biosynthetic proteins provide starting points  
302 for SARS-CoV-2 therapeutics able to target emerging variants. With technical optimisation in

303 binder selection and effort to stabilize them in the nasal cavity, we believe that stable  
304 proteinaceous inhibitors like  $\alpha$ Reps and derivatives have a real future to threat future pandemics  
305 associated to various emerging respiratory viruses.

## 306 **Materials and methods**

### 307 **Production of the receptor binding domain (RBD) of the SARS-CoV-2 spike**

308 The RBD (223 amino acids starting at position 319 of the spike sequence) coding sequence was  
309 cloned in frame behind a sequence encoding a signal peptide and in front of a His-tag coding  
310 sequence in the eukaryotic pYD11 expression plasmid. The resulting plasmid was transfected  
311 with PEI<sub>max</sub> (24765-1) (Polysciences, Inc.) in EXPI-293F cells (A14527) (Thermofisher).  
312 Transfected cells were then maintained in EXPI expression medium (Gibco, Thermofisher).  
313 Cells were removed by mild centrifugation at day+7, and the RBD was extracted from the cell  
314 culture medium by Ni<sup>2+</sup> affinity chromatography followed by gel filtration. About 10 mg of  
315 RBD were purified for  $\alpha$ Reps screening and further characterization.

316

### 317 **Screening of the $\alpha$ Rep library against the RBD**

318 The construction of the  $\alpha$ Rep phage library 2.1 has been previously described [24]. The  $\alpha$ Rep  
319 library was constructed by polymerization of synthetic microgenes corresponding to individual  
320 HEAT-like repeats, and the  $\alpha$ Rep proteins were expressed at the surface of M13-derived  
321 filamentous phages. The library is estimated to contain  $1.7 \times 10^9$  independent clones. The  $\alpha$ Rep  
322 library screening was carried out as described by Hadpech et al., 2017 [8] with minor  
323 modifications. Purified RBD diluted at 1 mM in PBS containing 0.05% Tween-20 (PBST) was  
324 immobilized on Ni<sup>++</sup>-NTA-biotin streptavidin-coated 96-well ELISA plate by incubation  
325 overnight at 4°C in a moisture chamber. The coated wells were washed four times with PBST,  
326 and saturated with blocking solution (2% BSA in PBST; 200  $\mu$ L/well) for 1h, after which an  
327 aliquot of the phage library was added to the RBD coated wells, and incubated at room  
328 temperature for 2h with shaking. Next, wells were extensively washed in PBST, and bound  
329 phages were eluted by three successive rounds of adsorption/elution. Phage elution was  
330 performed by an acidic glycine solution (0.1 M glycine-HCl, pH 2.5) and buffered using Tris 1

331 M. The population of  $\alpha$ Rep-displayed phages eluted from the RBD bait was amplified and  
332 subcloned in a XL-1 Blue cells. Individual phage clones were selected and amplified as  
333 previously described [5], and their respective binding activity towards the RBD was determined  
334 by ELISA. 100  $\mu$ L-aliquots of purified RBD were diluted in PBS and loaded into the wells of  
335 a Ni<sup>++</sup>-NTA-biotin streptavidin-coated ELISA plate, then incubated overnight at 4°C. The  
336 coated plate was washed four times with TBST, then blocked with PBST-BSA (200  $\mu$ L per  
337 well) for 1 hour with shaking. After a washing step, 100  $\mu$ L-aliquots of each phage culture  
338 supernatant were added to the wells and incubated at room temperature for 1 hour, followed by  
339 HRP-conjugated mouse anti-M13 (Interchim) diluted to 1:2,000 in TBST-BSA (100  $\mu$ L-aliquot  
340 per well), and incubation proceeded for an extra 1 hour. The wells were washed again, prior to  
341 the addition of 100  $\mu$ L BM Blue POD soluble Substrate (Roche). Reaction was stopped with 1  
342 N HCl, and absorbance measured at 450 nm. Phage clones showing a high binding activity  
343 towards the immobilized target were sequenced and kept for cytoplasmic expression of  
344 individual  $\alpha$ Rep proteins.

345

#### 346 **$\alpha$ Reps expression and purification**

347 The  $\alpha$ Rep genes encoding the RBD binders were subcloned in the bacterial expression vector  
348 pQE81 and resulting plasmids used for transforming Rosetta cells.  $\alpha$ Rep gene expression was  
349 induced by IPTG addition (0.5 to 1 mM final concentration) for 4 hours at 37°C. Next, bacteria  
350 were pelleted by centrifugation (5.000 x g for 30 min at 4°C) and bacterial cell pellets were  
351 resuspended in 200 mM NaCl, 20 mM Tris pH 7.4 to 8, containing a cocktail of protease  
352 inhibitors (Roche Diagnostics GmbH). Then, bacterial suspension was lysed by sonication in  
353 ice (5 times x (30 s sonication at around 40% sonication amplitude and 30 s rest)) using a Q700  
354 QSONICA Sonicator. Bacterial cells lysates were clarified by centrifugation at 10.000  $\times$  g for  
355 30 min at 4°C. Soluble  $\alpha$ Reps were purified by affinity chromatography on HisTrap columns



356 (GE Healthcare Life Sciences) and analyzed by SDS-PAGE. Fractions of interest were pooled  
357 and injected in a Gel filtration Superdex S200 previously equilibrated with PBS. Fractions  
358 containing purified  $\alpha$ Reps were pooled and frozen at  $-20^{\circ}\text{C}$ .

359

### 360 **$\alpha$ Reps circular dichroism**

361 Circular dichroism spectra were recorded with a Jasco J-810 system. 200  $\mu\text{L}$  of each purified  
362  $\alpha$ Reps C2, F9 and F9-C2 in PBS buffer at respectively 0.5 mg/mL, 0.75 mg/mL and 1 mg/mL  
363 were disposed in a 3 mm quartz cuvette. Samples were exposed to increasing temperatures from  
364  $25^{\circ}\text{C}$  to  $95^{\circ}\text{C}$  with a measurement every  $0.5^{\circ}\text{C}$  at 230 nm.

365

### 366 **Affinity determination by Bio Layer Interferometry**

367 Binding kinetics experiments were performed on an Octet system (Octet RED96) (FortéBio,  
368 CA). A black bottom 96-well microplate (Greiner Bio-One # 655209) was filled with 200  $\mu\text{L}$   
369 of solution ( $\alpha$ Reps in PBS buffer) and agitated at 1 000 rpm, and all experiments were carried  
370 out at  $25^{\circ}\text{C}$ . Tips were hydrated in PBS buffer for 1 hour at room temperature prior experiments.  
371 Biotinylated SARS-CoV-2 RBD or S1 (4  $\mu\text{g}/\text{mL}$ ) were loaded on streptavidin SA (18-0009)  
372 biosensors (Pall ForteBio) for 1 min. After a baseline step in assay buffer (PBS [pH 7.4], 0.1%  
373 bovine serum albumin, 0.02% Tween 20) and a quenching step in 5  $\mu\text{g}/\text{mL}$  biocytin, ligand-  
374 loaded sensors were dipped into known concentrations of  $\alpha$ Reps for an association phase during  
375 500 to 700 seconds. The sensors were then dipped in assay buffer for a dissociation step during  
376 1000 seconds in assay buffer. Association and dissociation curves were globally fitted to a 1:1  
377 binding model except for F9-C2 whose fitting model was 1:2. Binding curves were fit using the  
378 “association then dissociation” equation in the FortéBio Data analysis software version 7.1 to  
379 calculate  $K_D$ .

380

## 381 **Competition assays**

382 Competition assays between  $\alpha$ Reps were performed with biotinylated SARS-CoV-2 RBD (4  
383  $\mu\text{g}/\text{mL}$ ) loaded on SA biosensors for 1 min. After a baseline step in assay buffer and a quenching  
384 step, a first association is realised with an  $\alpha$ Rep at 100 nM for 2000 seconds followed by a  
385 second association step with a second  $\alpha$ Rep at 100 nM during 1000 seconds, and finally a short  
386 dissociation step of 300 s in assay buffer. For competition between  $\alpha$ REP and ACE2, the second  
387 analyte is replaced by soluble ACE2 at 100 nM.

388

## 389 **MLV pseudo-typed particles production and $\alpha$ Reps neutralization activity of SARS-** 390 **CoV-2 pseudotypes**

391 For pseudotyping, murine leukemia virus pseudo-typed particles (PP) containing the spike of  
392 SARS-CoV-2 or derived mutants were produced according to a published protocol [15].  
393 Briefly, HEK-293TT cells ( $10^6$  cells per P6 well) were transfected with plasmids encoding  
394 GAG-POL, F-LUC and SARS-CoV-2 spikes. Supernatants containing the pseudo-typed  
395 particles were harvested at 48 hours after transfection, pooled and filtered through  $0.45 \mu\text{m}$   
396 pore-sized membranes. Five different PP were produced, a first containing the spike of the  
397 SARS-CoV-2 type (Genebank accession number: MN908947), and the four others containing  
398 the spike with RBD mutations representatives of the  $\alpha$  variant (N501Y substitution), the  $\beta$   
399 variant (N501Y, K417N and E484K mutations), the  $\gamma$  variant (N501Y, K417T and E484K  
400 substitutions), the  $\kappa/\delta$  variant (substitutions L452R and E484Q) and the o variant (S371L,  
401 S373P, S375F, K417N, N440K, G446S, S477N, T478K, E484A, Q493K, G496S, Q498R,  
402 N501Y, Y505H substitutions).

403 The day before transduction, around 20.000 hACE2-HEK-293T cells were seeded in wells of  
404 P96 plates. Three to five-folds serial dilutions of  $\alpha$ Reps in complete medium (DMEM + 10%  
405 FBS) were pre-incubated with pseudo-typed particles to a final volume of  $200 \mu\text{L}$  for one hour

406 at 37°C. The mixture was next added to cells for 48 to 72 hours at 37°C. Then, cells were  
407 washed in PBS and lysed as indicated by the manufacturer (Promega # E1501 Luciferase Assay  
408 system). Luciferase activity was measured on an Infinite M200Pro TECAN apparatus. MLV  
409 pseudo-typed particles with the G glycoprotein of the vesicular stomatitis virus (VSV) were  
410 used to monitor the specificity of the neutralization activity at the highest  $\alpha$ Rep concentration  
411 used in the assay. Luciferase activity of each condition was normalised to the reference value,  
412 i.e the luciferase activity of the infected cells without  $\alpha$ Reps.

413

#### 414 **Virus stock production and quantification of $\alpha$ Reps neutralization activity**

415 SARS-CoV-2 isolate France/IDF0372/2020 was kindly supplied by Sylvie van der Werf. Viral  
416 stocks were prepared by propagation in Vero E6 cells in Dulbecco's modified Eagle's medium  
417 (DMEM) supplemented with 2% (v/v) fetal bovine serum (FBS, Invitrogen). Titres of virus  
418 stocks were determined by plaque assay.

419 To measure the neutralization activity of  $\alpha$ Reps, three or five-folds dilutions of  $\alpha$ Reps were  
420 mixed with  $2 \times 10^4$  plaque forming units of SARS-CoV-2 in DMEM for one hour at 37°C. This  
421 mixture was added to Vero-E6 cells (CRL-1586, ATCC) seeded in a 96-well plate one day  
422 before. Cell viability was measured 72 hours post-infection by adding 100 $\mu$ l of CellTiter-Glo  
423 reagent to each well as described in the manufacturers protocol (CellTiter-Glo Luminescent  
424 Cell Viability Assay, Promega # G7571). Luminescence was quantified using the Infinite  
425 M200Pro TECAN apparatus.

426

#### 427 **Golden Syrian hamster infections and assessment of $\alpha$ REPs antiviral activity**

428 ***Hamster infections.*** Thirty-two specific-pathogen-free (SPF) 8 weeks-old Golden Syrian  
429 hamsters (*Mesocricetus auratus*, males, provided by Janvier-Labs, Le Genest-Saint-Isle,  
430 France) housed under BSL-III conditions were kept according to the standards of French law

431 for animal experimentation. The study was carried out following a protocol approved by the  
432 ANSES/EnvA/UPEC Ethics Committee (CE2A-16) and authorized by the French ministry of  
433 Research under the number APAFIS#25384-2020041515287655 v6 in accordance with the  
434 French and European regulations.

435 Groups of eight hamsters were treated with either F9-C2, G1 or H7 (recognizing an influenza  
436 virus protein) by nasal instillation (80  $\mu$ L of PBS containing 0.6 mg of  $\alpha$ Rep). Animals were  
437 infected 1 hour later (**Fig. 5A** and **6A**) with  $5 \cdot 10^3$  TCID<sub>50</sub> of SARS-CoV-2 isolate  
438 BetaCoV/France/IDF/200107/2020 kindly provided by the Urgent Response to Biological  
439 Threats (CIBU) hosted by Institut Pasteur (Paris, France) and headed by Dr. Jean-Claude  
440 Manuguerra. The human sample from which strain BetaCoV/France/IDF/200107/2020 was  
441 isolated has been provided by Dr Olivier Paccoud from the La Pitié-Salpêtrière Hospital. With  
442 a history of 3 passages in Vero E6 cells, the seed stock was titrated in Vero E6 cells to a  
443 concentration of  $6.8 \log_{10}$  TCID<sub>50</sub>/mL. Nasal swabs were performed daily to measure the  
444 secreted virus load by brushing the nostrils of the animal. Eight animals were euthanized 1-day  
445 post infection (dpi). The treatment with  $\alpha$ Reps was repeated daily for one group of hamsters  
446 euthanized at 3 dpi. For each hamster, we collected the head which was separated into two  
447 hemi-heads, of which one was used for histology and the other for qPCR analysis.

448 ***Gene expression quantification by RT-qPCR.*** Total RNA was extracted from frozen olfactory  
449 mucosa and lungs using the Trizol method. Oligo-dT first strand cDNA were synthesized from  
450 5  $\mu$ g total RNA by iScriptAdv cDNA kit (Biorad, # 1725038) following the manufacturers  
451 recommendations. qPCR was performed using cDNA templates (5  $\mu$ L) added to a 15  $\mu$ L  
452 reaction mixture containing 500 nM primers (sequences in Table 1) and iTaq Universal SYBR  
453 Green Supermix (Biorad, # 1725124) using a thermocycler (Mastercycler ep realplex<sup>2</sup>,  
454 Eppendorf). The expression levels of target genes were measured using the Eppendorf realplex<sup>2</sup>  
455 software. A dissociation curve was carried out at the end of the PCR cycle to verify the

456 efficiency of the primers to produce a single and specific PCR amplification. Quantification  
457 was achieved using the  $\Delta\Delta C_t$  method. Standard controls of specificity and efficiency of the  
458 qPCR assays were performed. The mRNA expression was normalized to the expression level  
459 of  $\beta$ -actin and an efficiency corrective factor was applied for each primer pair [25].

460 **Table 1: Primers used for qPCR reactions.**

| Gene           | Primer 5' > 3'         | Primer 3' < 5'          |
|----------------|------------------------|-------------------------|
| $\beta$ -actin | ACTGCCGCATCCTCTTCCT    | TCGTTGCCAATGGTGATGAC    |
| IL-6           | AGACAAAGCCAGAGTCATT    | TCGGTATGCTAAGGCACAG     |
| IL-1 $\beta$   | ATCTTCTGTGACTCCTGG     | GGTTTATGTTCTGTCCGT      |
| TNF- $\alpha$  | AACTCCAGCCGGTGCCTAT    | G TTCAGCAGGCAGAAGAGGATT |
| Ncf-2          | ATGTTCAATGGACAGAAGGGGC | TGGGATCTTTCTGGGGCACT    |

461  
462 ***Viral titration of nasal swabs.*** Nasal swabs were diluted in 400  $\mu$ L of DMEM medium  
463 supplemented with 1% sodium pyruvate and antibiotics and stored at  $-80^{\circ}\text{C}$  until titration by  
464 tissue culture infectious dose 50% (TCID<sub>50</sub>) on Vero E6 cells. Briefly, each nasal swab was  
465 incubated in eight consecutive wells of 96-well microplates, and then serially diluted from  $10^1$   
466 <sup>1</sup> to  $10^{-6}$  within DMEM containing 1% Sodium Pyruvate and 1% antibiotics  
467 (Penicillin/Streptomycin). After 1h30 incubation at  $37^{\circ}\text{C}$ , 100 $\mu$ L of complete DMEM medium  
468 with 5% FCS, 1% sodium pyruvate and antibiotics are added. The cells are then incubated for  
469 4 days at  $37^{\circ}\text{C}$ . Then, microplates were qualitatively read according to an “all or nothing”  
470 scoring method for the presence of viral cytopathic effect (CPE). Infectious titres are expressed  
471 as TCID<sub>50</sub> per mL according to the Spearman Karber method [26].

472 **Histopathology.** The immunohistochemistry analysis of the olfactory mucosa tissue sections  
473 was performed as described previously in mice [27]. Briefly, the hamster hemi-head was fixed  
474 for 3 days at room temperature in 4% Neutral Buffer Formalin (F0043, Diapath), then  
475 decalcified for three weeks in Osteosoft mild decalcifier solution (1017281000, Merck) at 4°C.  
476 Blocks and tissues were cryoprotected with sucrose (30%) then embedding with Eprelia Neg-  
477 50 (11912365, FisherScientific). Cryo-sectioning (14 µm) was performed on median transversal  
478 sections of the nasal cavity, perpendicular to the hard palate, in order to highlight vomeronasal  
479 organ, olfactory mucosa, Steno's gland and olfactory bulb. Sections were stored at -80°C until  
480 use. Sections were rehydrated in PBS for 5 min and non-specific staining was blocked by  
481 incubation in PBS with 1% bovine serum albumin (BSA) and 0.05% Tween-20. The sections  
482 were then incubated overnight in PBS with 0.2% BSA and 0.05% Tween-20 with primary  
483 antibodies directed against SARS-CoV-2 Nucleocapsid Protein (1:500; mouse monoclonal, #  
484 ZMS1075, Merck); Iba1 (1: 1000; goat polyclonal; ab178846, Abcam, France). Fluorescence  
485 staining was performed using goat anti-rabbit Alexa- Fluor-488 (1:800; Molecular Probes –  
486 A32731; Invitrogen, Cergy Pontoise, France) and donkey anti-mouse Alexa-Fluor 555 (1:800;  
487 Molecular Probes – A32773; Invitrogen, Cergy Pontoise, France) secondary antibodies. Images  
488 were taken at ×100 magnification using an Olympus IX71 inverted microscope equipped with  
489 an Orca ER Hamamatsu cooled CCD camera (Hamamatsu Photonics France, Massy, France).  
490 Images were quantified using ImageJ (Rasband, W.S., ImageJ, U. S. National Institutes of  
491 Health, Bethesda, Maryland, USA, <http://imagej.nih.gov/ij/>, 1997–2012) to threshold specific  
492 staining of SARS-CoV-2 in the dorso-medial area of the nasal cavity. We measured the total  
493 infected area in this zone displaying the highest area of olfactory epithelium using the same  
494 threshold for all animals.

495

496 **Quantification of αReps neutralization activity of SARS-CoV-2 virus variants**

497 **Cell line.** VeroE6 TMPRSS2 cells (ID 100978) were obtained from CFAR and were grown in  
498 minimal essential medium (Life Technologies) with 7.5% heat-inactivated fetal calf serum  
499 (FCS; Life Technologies with 1% penicillin/streptomycin (PS, 5000U.mL<sup>-1</sup> and  
500 5000µg.mL<sup>-1</sup> respectively; Life Technologies) and supplemented with 1% non-essential  
501 amino acids (Life Technologies) and G-418 (Life Technologies), at 37°C with 5% CO<sub>2</sub>.

502 **Virus strains.** SARS-CoV-2 strain BavPat1 was obtained from Pr. C. Drosten through EVA  
503 GLOBAL (<https://www.european-virus-archive.com/>) and contains the D614G mutation.  
504 SARS-CoV-2 Alpha, (201/501YV.1) was isolated from a 18 years-old patient. The full genome  
505 sequence has been deposited on GISAID: EPI\_ISL\_918165. The strain is available through  
506 EVA GLOBAL: UVE/SARS-CoV-2/2021/FR/7b (lineage B 1. 1 .7, ex UK) at  
507 [https://www.european-virus-archive.com/virus/sars-cov-2-uvesars-cov-22021fr7b-lineage-b-](https://www.european-virus-archive.com/virus/sars-cov-2-uvesars-cov-22021fr7b-lineage-b-1-1-7-ex-uk)  
508 [1-1-7-ex-uk](https://www.european-virus-archive.com/virus/sars-cov-2-uvesars-cov-22021fr7b-lineage-b-1-1-7-ex-uk). SARS CoV-2 Beta (SA lineage B 1.351) was isolated in France in 2021, The strain  
509 is available through EVA GLOBAL: UVE/SARS-CoV-2/2021/FR/1299-ex SA (lineage B  
510 1.351) at [https://www.european-virus-archive.com/virus/sars-cov-2-uvesars-cov-22021fr1299-](https://www.european-virus-archive.com/virus/sars-cov-2-uvesars-cov-22021fr1299-ex-sa-lineage-b-1351)  
511 [ex-sa-lineage-b-1351](https://www.european-virus-archive.com/virus/sars-cov-2-uvesars-cov-22021fr1299-ex-sa-lineage-b-1351). Sars-Cov-2 Gamma (SARS-CoV-2/2021/JP/TY7-503 lineage P.1, ex  
512 Brazil) was isolated in Japan in January 2021. The full genome sequence has been deposited on  
513 GISAID: EPI\_ISL\_877769. The strain is available through EVA GLOBAL at  
514 [https://www.european-virus-archive.com/virus/sars-cov-2-virus-strain-sars-cov-22021jpty7-](https://www.european-virus-archive.com/virus/sars-cov-2-virus-strain-sars-cov-22021jpty7-503-lineage-p1-ex-brazil)  
515 [503-lineage-p1-ex-brazil](https://www.european-virus-archive.com/virus/sars-cov-2-virus-strain-sars-cov-22021jpty7-503-lineage-p1-ex-brazil). SARS-CoV-2 Delta, (India lineage B.1.617.2): the full genome  
516 sequence has been deposited on GISAID: EPI\_ISL\_2838050. The strain is available through  
517 EVA GLOBAL: SARS-CoV-2/2021/FR/0610 (Lineage B 1.617.2, Delta) at  
518 [https://www.european-virus-archive.com/virus/sars-cov-2-virus-strain-sars-cov-22021fr0610-](https://www.european-virus-archive.com/virus/sars-cov-2-virus-strain-sars-cov-22021fr0610-lineage-b-16172-delta)  
519 [lineage-b-16172-delta](https://www.european-virus-archive.com/virus/sars-cov-2-virus-strain-sars-cov-22021fr0610-lineage-b-16172-delta).

520 To prepare the virus working stocks, a 25cm<sup>2</sup> culture flask of confluent VeroE6 TMPRSS2  
521 cells growing with MEM medium with 2.5% FCS was inoculated at a multiplicity of infection

522 (MOI) of 0.001. Cell supernatant medium was harvested at the peak of replication and  
523 supplemented with 25 mM HEPES (Sigma-Aldrich) before being stored frozen in aliquots at -  
524 80°C. All experiments with infectious virus were conducted in a biosafety level 3 laboratory.

525

### 526 *EC50 and EC90 determination*

527 One day prior to infection,  $5 \times 10^4$  VeroE6/TMPRSS2 cells per well were seeded in 100  $\mu$ L assay  
528 medium (containing 2.5% FCS) in 96 well culture plates.  $\alpha$ Reps were diluted in PBS with  $\frac{1}{2}$   
529 dilutions from 10.000 to 9.76 ng/ml. The next day, 25  $\mu$ L of a virus mix diluted in medium was  
530 added to the wells. The amount of virus working stock used was calibrated prior to the assay,  
531 based on a replication kinetics, so that the viral replication was still in the exponential growth  
532 phase for the readout as previously described [28–32]. This corresponds here to a MOI of 0.002.  
533 Then eleven 2-fold serial dilutions of  $\alpha$ Reps in triplicate were added to the cells (25  $\mu$ L/well,  
534 in assay medium). Four virus control wells were supplemented with 25  $\mu$ L of assay medium.  
535 Plates were first incubated 15 min at room temperature and then 2 days at 37°C prior to  
536 quantification of the viral genome by real-time RT-PCR. To do so, 100  $\mu$ L of viral supernatant  
537 was collected in S-Block (Qiagen) previously loaded with VXL lysis buffer containing  
538 proteinase K and RNA carrier. RNA extraction was performed using the Qiacube HT automat  
539 and the QIAamp 96 DNA kit HT following manufacturer instructions. Viral RNA was  
540 quantified by real-time RT-qPCR (GoTaq 1-step qRt-PCR, Promega) using 3.8  $\mu$ L of extracted  
541 RNA and 6.2  $\mu$ L of RT-qPCR mix and standard fast cycling parameters, i.e., 10 min at 50°C,  
542 2 min at 95°C, and 40 amplification cycles (95°C for 3 sec followed by 30 sec at 60°C).  
543 Quantification was provided by four 2 log serial dilutions of an appropriate T7-generated  
544 synthetic RNA standard of known quantities (102 to 108 copies/reaction). RT-qPCR reactions  
545 were performed on QuantStudio 12K Flex Real-Time PCR System (Applied Biosystems) and  
546 analyzed using QuantStudio 12K Flex Applied Biosystems software v1.2.3. Primers and probe



547 sequences, which target SARS-CoV-2 N gene, were: Fw: GGCCGCAAATTGCACAAT ; Rev  
548 : CCAATGCGCGACATTCC; Probe: FAM-CCCCAGCGCTTCAGCGTTCT-BHQ1. Viral  
549 inhibition was calculated as follow:  $100 * ( \text{quantity mean VC- sample quantity} ) / \text{quantity mean}$   
550  $\text{VC}$  . The 50% and 90% effective concentrations (EC50,; compound concentration required to  
551 inhibit viral RNA replication by 50%) were determined using logarithmic interpolation after  
552 performing a nonlinear regression (log(agonist) vs. response -- Variable slope (four  
553 parameters)) as previously described [28–32]. All data obtained were analyzed using GraphPad  
554 Prism 8 software (Graphpad software).

555

### 556 **Statistical analysis**

557 Data shown as the means  $\pm$  SEM. All statistical comparisons were performed using Prism 8  
558 (GraphPad). Quantitative data were compared across groups using two-way ANOVA test for  
559 pseudovirus assay, weight, nasal swab and virus titre evolution. All other parameters were  
560 tested using the Mann-Whitney non-parametric test. Statistical significance was determined as  
561 p-value  $< 0.05$ .

562

563

564 **Acknowledgments:** We thank Sylvie van der Werf for the gift of the SARS-CoV-2 strain  
565 France/IDF0372/2020, and Ameline Batsché for her help in  $\alpha$ Rep production and purification.

566 **Funding:** This study was supported by the Agence Nationale de la Recherche (ANR) and by  
567 the Fédération pour la recherche médicale (ANR 20 Flash Covid 19 – FRM program). **Author**  
568 **contributions:** S.T.: Methodology, Formal analysis, Investigation, Data curation, Writing –  
569 original draft, Writing – review & editing, Visualization, and Supervision. N.L.: Investigation  
570 and Data curation. A.D.: Investigation and Data curation. A.U.: Resources, Methodology,  
571 Investigation, Writing – review & editing. M.V.-L.: Resources, Methodology, Investigation,

572 Writing – review & editing. M.L.: Methodology, Data curation, Writing – review & editing.  
573 B.d.C.: Investigation and Data curation. C.B.: Investigation and Data curation. A.D.:  
574 Investigation and Data curation. A.F.: Investigation and Data curation. A.S.-A.-D.:  
575 Investigation and Data curation. J. M.: Methodology, Investigation and Data curation. B.K.:  
576 Resources. J.D.: Formal analysis and Data curation. A.R.: Methodology, Formal analysis,  
577 Investigation, Data curation, Writing – review & editing, Visualization, and Supervision. P.M.:  
578 Methodology, Formal analysis, Investigation, Data curation, Writing – review & editing,  
579 Visualization, and Supervision. S.L.P.: Methodology, Formal analysis, Investigation, Data  
580 curation, Writing – review & editing, Visualization, and Supervision. N.M.: Methodology,  
581 Formal analysis, Investigation, Data curation, Writing – original draft, Writing – review &  
582 editing, Visualization, and Supervision. B.D.: Conceptualization, Methodology, Formal  
583 analysis, Investigation, Data curation, Writing – original draft; Writing – review & editing,  
584 Supervision, and Funding acquisition. **Data and materials availability:**  $\alpha$ Rep sequences are  
585 shown in **Fig S1**.

586

587 **Figure legends**

588 **Fig 1. Selection and characterization of anti-spike  $\alpha$ Reps.**

589 Screening an  $\alpha$ Reps phage library allowed the identification of several binders specific of the  
590 RBD of the SARS-CoV-2 spike protein. Their binding affinity for the S1 domain was measured  
591 by biolayer interferometry. The neutralization activity of selected  $\alpha$ Reps was evaluated using a  
592 pseudo-typed S SARS-CoV-2 neutralization assay and a SARS-CoV-2 infection assay.  
593 Competitive binding assays were carried out by BLI to identify  $\alpha$ Reps recognizing non-  
594 overlapping binding sites. Then,  $\alpha$ Rep derived constructs followed the same characterization  
595 steps than their single counterparts. The protective potency of the best candidate was analyzed  
596 *in vivo* in the golden Syrian hamster model.

597

598 **Fig 2. Selection of  $\alpha$ Reps based on their affinities and neutralization activities.**

599 BLI binding kinetics measurements are shown for F9 (A) and C2 (B). Equilibrium dissociation  
600 constants ( $K_D$ ) were determined on the basis of fits, applying 1:1 interaction model;  $k_a$ ,  
601 association rate constant;  $k_d$ , dissociation rate constant. (C) Pseudo-typed SARS-CoV-2  
602 neutralization assay was shown with selected  $\alpha$ Rep (C2, F9, C7, G1). An  $\alpha$ Rep specific to  
603 influenza polymerase (H7) was chosen as a negative control. To assess  $\alpha$ Reps specificity,  
604 pseudo-typed VSV-G were incubated with the highest concentration of each  $\alpha$ Rep (3  $\mu$ M).  
605 Pseudo-type particles entry into cells was quantified by measuring luciferase activity (n=3,  
606 mean  $\pm$  SEM, two-way ANOVA, \* $P$ <0.05). (D) Cell viability of infected cells in presence of  
607 dilutions of  $\alpha$ Reps C2, C7, F9, G1 and H7 was monitored using the CellTiter-Glo Luminescent  
608 Assay Kit (Promega). Infected cells (triangle) and mock-infected cells (square) were included  
609 in the assay as controls (n=2, mean is presented). (E) Half maximal inhibitory concentration  
610 ( $IC_{50}$ ) were calculated using “log(inhibitor) vs. normalized response” equation from the

611 neutralization potency curves with GraphPad Prism 8 software. ND: Not done, NA: Not  
612 available.

613

614 **Fig 3. Competitive binding assays. (A and B)** BLI experiments showed that C2 and F9 could  
615 bind RBD simultaneously. **(C)** Binding of ACE2 was assessed after a first association phase  
616 with  $\alpha$ Reps C2 and F9, the F9-C2 construct, the VHH72 [16] or with a negative control (NR).  
617 F9-C2 and VHH72 blocked the binding of RBD to ACE2. While F9 inhibited partially ACE2  
618 binding, C2 did not compete with ACE2 binding.

619

620 **Fig 4. The F9-C2 and C2-foldon constructs properties. (A)** BLI binding kinetics  
621 measurements for F9-C2 to the S1-immobilized biosensor. **(B)** Pseudo-typed SARS-CoV-2  
622 particles neutralization assay was performed with F9, C2, F9-C2 and C2-foldon constructs  
623 ( $n=3$ , mean  $\pm$  SEM, two-way ANOVA,  $*P<0.0001$ ). **(C)** Cell viability of SARS-CoV-2-  
624 infected cells in presence of dilutions of F9-C2, C2-foldon, C2, F9 and H7 (an  $\alpha$ Rep negative  
625 control) was monitored using the CellTiter-Glo Luminescent Assay Kit (Promega) ( $n=2$ , mean  
626 is presented). Infected cells (triangle) and mock-infected cells (square) were included in the  
627 assay. Half maximal inhibitory concentration ( $IC_{50}$ ) were displayed. **(D)** SARS-CoV-2  
628 neutralisation by  $\alpha$ Reps constructs. Virus replication was quantified by qRT-PCR in infected  
629 cells treated by C2, F9, F9-C2, C2-foldon ( $n=3$ , mean  $\pm$  SEM). Half maximal effective  
630 concentration ( $EC_{50}$ ) were shown.

631

632 **Fig 5. Efficacy of F9-C2  $\alpha$ Rep prophylaxis in SARS-CoV-2 infection in a golden Syrian**  
633 **hamster model. (A)** Overview of the experiment design. 6 mg/kg of  $\alpha$ Reps were delivered  
634 intranasally in hamsters 1h prior to infection with  $5 \cdot 10^3$  TCID<sub>50</sub> of SARS-CoV-2. **(B)** Evolution  
635 of animal weight ( $n=4$ , mean of the relative weight to 1-day prior infection  $\pm$  SEM, two-way

636 ANOVA). (C) Evolution of virus titre in nasal swabs (n=4, mean of TCID<sub>50</sub> ± SEM, two-way  
637 ANOVA, \*\*\*\*P<0.0001) (D) Quantification of RNA encoding SARS-CoV-2 protein E, IL-6,  
638 TNFα, Ncf2 in the olfactory turbinates, relative to viral infection, inflammation and neutrophil  
639 respectively (normalized to β-actin, mean ± SEM, Mann–Whitney \*P<0.05). (E)  
640 Representative images of the infected olfactory epithelium area treated by G1 or F9-C2 in the  
641 rostral zone of the nasal cavity (1 dpi) showing respectively a strong and partial infection. (F)  
642 Measurement of the extent area of infection in the dorso-medial part of the hamster nose. Values  
643 represent the mean of infected area (Arbitrary Unit ± SEM, Mann–Whitney \*P<0.05).

644

645 **Fig 6. Efficacy of F9-C2 αRep repeated treatments in SARS-CoV-2 infection in a golden**  
646 **Syrian hamster model.** (A) Overview of the experiment design. 6 mg/kg of αReps were  
647 delivered intranasally in hamsters 1h prior to infection with 5.10<sup>3</sup> TCID<sub>50</sub> of SARS-CoV-2. The  
648 treatment was repeated on 1 dpi and 2 dpi for the group examined at 3 dpi. (B) Evolution of  
649 animal weight (n=4, mean of the relative weight to 1-day prior infection ± SEM, two-way  
650 ANOVA). (C) Evolution of virus titre in nasal swabs (n=4, mean of TCID<sub>50</sub> ± SEM, two-way  
651 ANOVA, \*\*\*\*P<0.0001) (D) quantification of RNA encoding SARS-CoV-2 protein E, IL-6,  
652 TNFα, Ncf2 in the olfactory turbinates, relative to viral infection, inflammation and neutrophil  
653 respectively (normalized to β-actin, mean ± SEM, Mann–Whitney \*P<0.05). (E)  
654 Representative images of the infected olfactory epithelium area treated by F9-C2 or H7 in the  
655 dorso-medial zone of the nasal cavity (1 dpi) showing respectively a partial infection with a  
656 low number of Iba1<sup>+</sup> immune cell infiltration and a strong infection associated with damage of  
657 the olfactory epithelium and Iba1<sup>+</sup> cell infiltration as well as desquamated cells in the lumen of  
658 the nasal cavity (white asterisk). (F) Measurement of the extent area of infection in the dorso-  
659 medial part of the hamster nose. Values represent the mean of infected area (Arbitrary Unit ±  
660 SEM, Mann–Whitney \*P<0.05).

661

662 **Fig 7. Neutralization activity of the F9-C2 and C2-foldon constructs against SARS-CoV-**  
663 **2 pseudo-typed and virus variants. (A)** F9, C2, F9-C2 and C2-foldon were tested for their  
664 ability to neutralize four SARS-CoV-2 pseudo-typed RBD mutants. Pseudo-typed VSV-G was  
665 incubated with the highest concentration of each  $\alpha$ Rep (500 nM) to validate specificity of  $\alpha$ Rep  
666 neutralization activity (n=3, mean  $\pm$  SEM, two-way ANOVA, \* $P$ <0.0001). **(B)** F9, C2, F9-C2  
667 and C2-foldon were tested for their ability to neutralize authentic SARS-CoV-2 virus variants  
668 (beta, gamma, delta and omicron) (n=3, mean  $\pm$  SEM). Chart including the EC50 and in nM  
669 **(C)** of each  $\alpha$ REP for each variant virus is depicted.

670

671

672

673

674

675 **Supplementary Fig. S1**

676  $\alpha$ Reps sequences

677

678 **Supplementary Fig. S2**

679 Thermal denaturation of  $\alpha$ Reps assessed by circular dichroism measurement of molar ellipticity  
680 at 230 nm.

681

682 **Supplementary Fig. S3**

683 Representative image of the olfactory epithelium (dorsomedial area) 15 min after F9-C2  
684 instillation revealed by an anti-His Tag. F9-C2 is mainly present in the mucus layer but some  
685 cells have integrated them (OE: Olfactory Epithelium / LP: Lamina Propria / white asterisk  
686 Lumen of the nasal cavity / red arrow: sustentacular cell like shape / white arrow (olfactory  
687 sensory neuron like shape).

688

689 **Supplementary Fig. S4**

690 Representative images of the dorso-medial part of the infected hamster nose treated by F9-C2  
691 or H7 (1 dpi). SARS-CoV-2 infected cells were revealed with an anti-N antibody. F9-C2 was  
692 found to protect the nasal cavity epithelium.

693

694

695

696

## 697 **Bibliography**

698

- 699 1. Hou YJ, Okuda K, Edwards CE, Martinez DR, Asakura T, Dinnon KH, et al. SARS-CoV-2 Reverse  
700 Genetics Reveals a Variable Infection Gradient in the Respiratory Tract. *Cell*. 2020;182: 429-  
701 446.e14. doi:10.1016/j.cell.2020.05.042
- 702 2. Bryche B, St Albin A, Murri S, Lacôte S, Pulido C, Ar Gouilh M, et al. Massive transient damage of  
703 the olfactory epithelium associated with infection of sustentacular cells by SARS-CoV-2 in  
704 golden Syrian hamsters. *Brain Behav Immun*. 2020;89: 579–586. doi:10.1016/j.bbi.2020.06.032
- 705 3. von Bartheld CS, Hagen MM, Butowt R. Prevalence of Chemosensory Dysfunction in COVID-19  
706 Patients: A Systematic Review and Meta-analysis Reveals Significant Ethnic Differences. *ACS*  
707 *Chem Neurosci*. 2020;11: 2944–2961. doi:10.1021/acscchemneuro.0c00460
- 708 4. Ledford H. Antibody therapies could be a bridge to a coronavirus vaccine - but will the world  
709 benefit? *Nature*. 2020 Aug;584(7821):333-334. doi: 10.1038/d41586-020-02360-y.
- 710 5. Valerio-Lepiniec M, Urvoas A, Chevrel A, Guellouz A, Ferrandez Y, Mesneau A, et al. The  $\alpha$ Rep  
711 artificial repeat protein scaffold: a new tool for crystallization and live cell applications.  
712 *Biochem Soc Trans*. 2015;43: 819–824. doi:10.1042/BST20150075
- 713 6. Andrade MA, Petosa C, O'Donoghue SI, Müller CW, Bork P. Comparison of ARM and HEAT  
714 protein repeats. *J Mol Biol*. 2001;309: 1–18. doi:10.1006/jmbi.2001.4624
- 715 7. Urvoas A, Guellouz A, Valerio-Lepiniec M, Graille M, Durand D, Desravines DC, et al. Design,  
716 Production and Molecular Structure of a New Family of Artificial Alpha-helical Repeat  
717 Proteins ( $\alpha$ Rep) Based on Thermostable HEAT-like Repeats. *J Mol Biol*. 2010;404: 307–327.  
718 doi:10.1016/j.jmb.2010.09.048
- 719 8. Hadpech S, Nangola S, Chupradit K, Fanhchaksai K, Furnon W, Urvoas A, et al. Alpha-helical  
720 HEAT-like Repeat Proteins ( $\alpha$ Rep) Selected as Interactors of HIV-1 Nucleocapsid Negatively  
721 Interfere with Viral Genome Packaging and Virus Maturation. *Sci Rep*. 2017;7: 16335.  
722 doi:10.1038/s41598-017-16451-w
- 723 9. Cai Y, Zhang J, Xiao T, Peng H, Sterling SM, Walsh RM, et al. Distinct conformational states of  
724 SARS-CoV-2 spike protein. *Science*. 2020;369: 1586–1592. doi:10.1126/science.abd4251
- 725 10. Hoffmann M, Kleine-Weber H, Schroeder S, Krüger N, Herrler T, Erichsen S, et al. SARS-CoV-2  
726 Cell Entry Depends on ACE2 and TMPRSS2 and Is Blocked by a Clinically Proven Protease  
727 Inhibitor. *Cell*. 2020;181: 271-280.e8. doi:10.1016/j.cell.2020.02.052
- 728 11. Benton DJ, Wrobel AG, Xu P, Roustan C, Martin SR, Rosenthal PB, et al. Receptor binding and  
729 priming of the spike protein of SARS-CoV-2 for membrane fusion. *Nature*. 2020;588: 327–330.  
730 doi:10.1038/s41586-020-2772-0
- 731 12. Yu F, Xiang R, Deng X, Wang L, Yu Z, Tian S, et al. Receptor-binding domain-specific human  
732 neutralizing monoclonal antibodies against SARS-CoV and SARS-CoV-2. *Signal Transduct Target*  
733 *Ther*. 2020;5: 212. doi:10.1038/s41392-020-00318-0



- 734 13. Harvey WT, Carabelli AM, Jackson B, Gupta RK, Thomson EC, Harrison EM, et al. SARS-CoV-2  
735 variants, spike mutations and immune escape. *Nat Rev Microbiol.* 2021;19: 409–424.  
736 doi:10.1038/s41579-021-00573-0
- 737 14. Greaney AJ, Loes AN, Crawford KHD, Starr TN, Malone KD, Chu HY, et al. Comprehensive  
738 mapping of mutations in the SARS-CoV-2 receptor-binding domain that affect recognition by  
739 polyclonal human plasma antibodies. *Cell Host Microbe.* 2021;29: 463-476.e6.  
740 doi:10.1016/j.chom.2021.02.003
- 741 15. Millet JK, Tang T, Nathan L, Jaimes JA, Hsu H-L, Daniel S, et al. Production of Pseudotyped  
742 Particles to Study Highly Pathogenic Coronaviruses in a Biosafety Level 2 Setting. *J Vis Exp JoVE.*  
743 2019; 10.3791/59010. doi:10.3791/59010
- 744 16. Wrapp D, De Vlioger D, Corbett KS, Torres GM, Wang N, Van Breedam W, et al. Structural Basis  
745 for Potent Neutralization of Betacoronaviruses by Single-Domain Camelid Antibodies. *Cell.*  
746 2020;181: 1436–1441. doi:10.1016/j.cell.2020.05.047
- 747 17. Tao Y, Strelkov SV, Mesyanzhinov VV, Rossmann MG. Structure of bacteriophage T4 fibrin: a  
748 segmented coiled coil and the role of the C-terminal domain. *Structure.* 1997;5: 789–798.  
749 doi:[https://doi.org/10.1016/S0969-2126\(97\)00233-5](https://doi.org/10.1016/S0969-2126(97)00233-5)
- 750 18. Sia SF, Yan L-M, Chin AW, Fung K, Choy K-T, Wong AY, et al. Pathogenesis and transmission of  
751 SARS-CoV-2 in golden Syrian hamsters. *Nature.* 2020;583: 834–838. doi:10.1038/s41586-020-  
752 2342-5
- 753 19. Jackson CB, Farzan M, Chen B, Choe H. Mechanisms of SARS-CoV-2 entry into cells. *Nat Rev Mol*  
754 *Cell Biol.* 2021; 1–18. doi:10.1038/s41580-021-00418-x
- 755 20. Chen F, Liu Z, Jiang F. Prospects of Neutralizing Nanobodies Against SARS-CoV-2. *Front*  
756 *Immunol.* 2021;12: 690742. doi:10.3389/fimmu.2021.690742
- 757 21. Valdez-Cruz NA, García-Hernández E, Espitia C, Cobos-Marín L, Altamirano C, Bando-Campos  
758 CG, et al. Integrative overview of antibodies against SARS-CoV-2 and their possible applications  
759 in COVID-19 prophylaxis and treatment. *Microb Cell Factories.* 2021;20: 88.  
760 doi:10.1186/s12934-021-01576-5
- 761 22. Ledford H. Antibody therapies could be a bridge to a coronavirus vaccine — but will the world  
762 benefit? *Nature.* 2020;584: 333–334. doi:10.1038/d41586-020-02360-y
- 763 23. Cunningham S, Piedra PA, Martinon-Torres F, Szymanski H, Brackeva B, Dombrecht E, et al.  
764 Nebulised ALX-0171 for respiratory syncytial virus lower respiratory tract infection in  
765 hospitalised children: a double-blind, randomised, placebo-controlled, phase 2b trial. *Lancet*  
766 *Respir Med.* 2021;9: 21–32. doi:10.1016/S2213-2600(20)30320-9
- 767 24. Guellouz A, Valerio-Lepiniec M, Urvoas A, Chevrel A, Graille M, Fourati-Kammoun Z, et al.  
768 Selection of Specific Protein Binders for Pre-Defined Targets from an Optimized Library of  
769 Artificial Helicoidal Repeat Proteins (alphaRep). *PLoS ONE.* 2013;8: e71512.  
770 doi:10.1371/journal.pone.0071512
- 771 25. Muller PY, Janovjak H, Miserez AR, Dobbie Z. Processing of gene expression data generated by  
772 quantitative real-time RT-PCR. *BioTechniques.* 2002;32: 1372–1374, 1376, 1378–1379.

- 773 26. Ramakrishnan MA. Determination of 50% endpoint titer using a simple formula. *World J Virol.*  
774 2016;5: 85. doi:10.5501/wjv.v5.i2.85
- 775 27. Bryche B, Dewaele A, Saint-Albin A, Le Poupon Schlegel C, Congar P, Meunier N. IL-17c is  
776 involved in olfactory mucosa responses to Poly(I:C) mimicking virus presence. *Brain Behav*  
777 *Immun.* 2019. doi:10.1016/j.bbi.2019.02.012
- 778 28. Touret F, Baronti C, Goethals O, Van Loock M, de Lamballerie X, Querat G. Phylogenetically  
779 based establishment of a dengue virus panel, representing all available genotypes, as a tool in  
780 dengue drug discovery. *Antiviral Res.* 2019;168: 109–113. doi:10.1016/j.antiviral.2019.05.005
- 781 29. Touret F, Gilles M, Barral K, Nougairède A, van Helden J, Decroly E, et al. In vitro screening of a  
782 FDA approved chemical library reveals potential inhibitors of SARS-CoV-2 replication. *Sci Rep.*  
783 2020;10: 13093. doi:10.1038/s41598-020-70143-6
- 784 30. Touret F, Driouich J-S, Cochin M, Petit PR, Gilles M, Barthélémy K, et al. Preclinical evaluation of  
785 Imatinib does not support its use as an antiviral drug against SARS-CoV-2. *Antiviral Res.*  
786 2021;193: 105137. doi:10.1016/j.antiviral.2021.105137
- 787 31. Weiss A, Touret F, Baronti C, Gilles M, Hoen B, Nougairède A, et al. Niclosamide shows strong  
788 antiviral activity in a human airway model of SARS-CoV-2 infection and a conserved potency  
789 against the Alpha (B.1.1.7), Beta (B.1.351) and Delta variant (B.1.617.2). *PLOS ONE.* 2021;16:  
790 e0260958. doi:10.1371/journal.pone.0260958
- 791 32. Kaptein SJF, Goethals O, Kiemel D, Marchand A, Kesteley B, Bonfanti J-F, et al. A pan-serotype  
792 dengue virus inhibitor targeting the NS3-NS4B interaction. *Nature.* 2021. doi:10.1038/s41586-  
793 021-03990-6
- 794

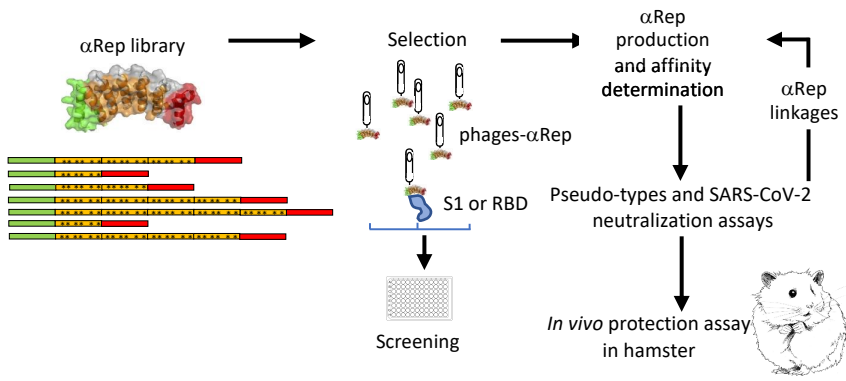

Figure 1

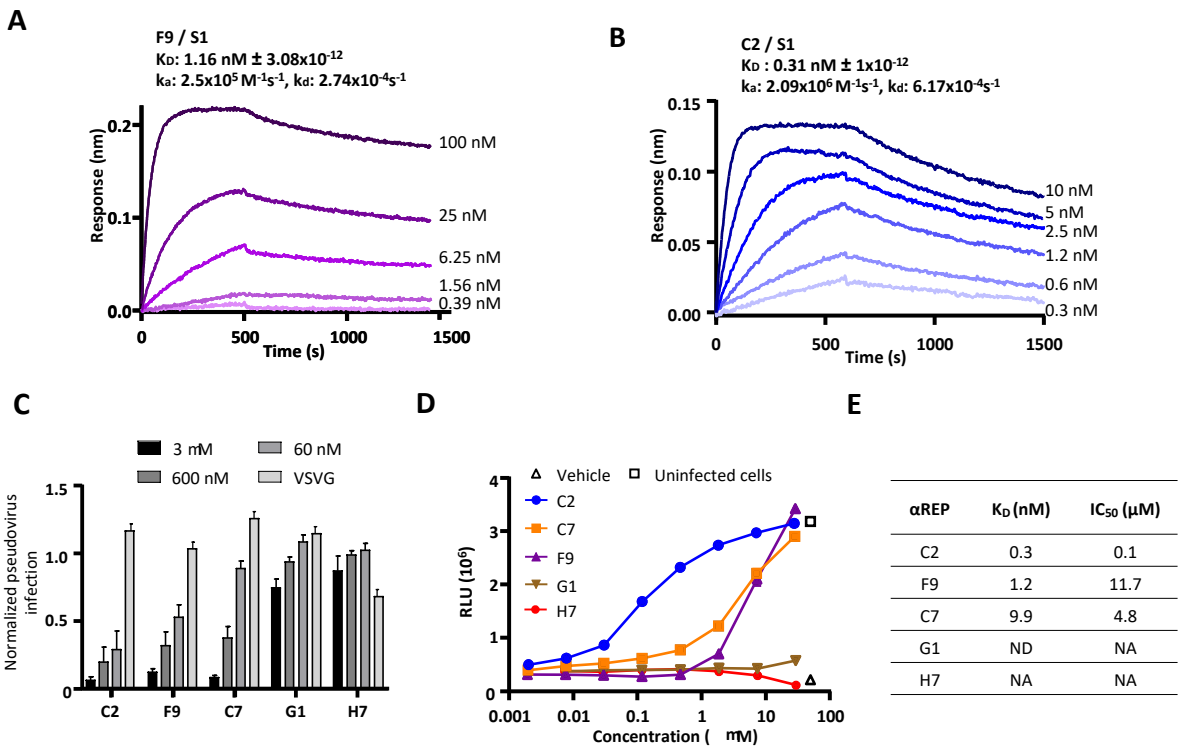

Figure 2

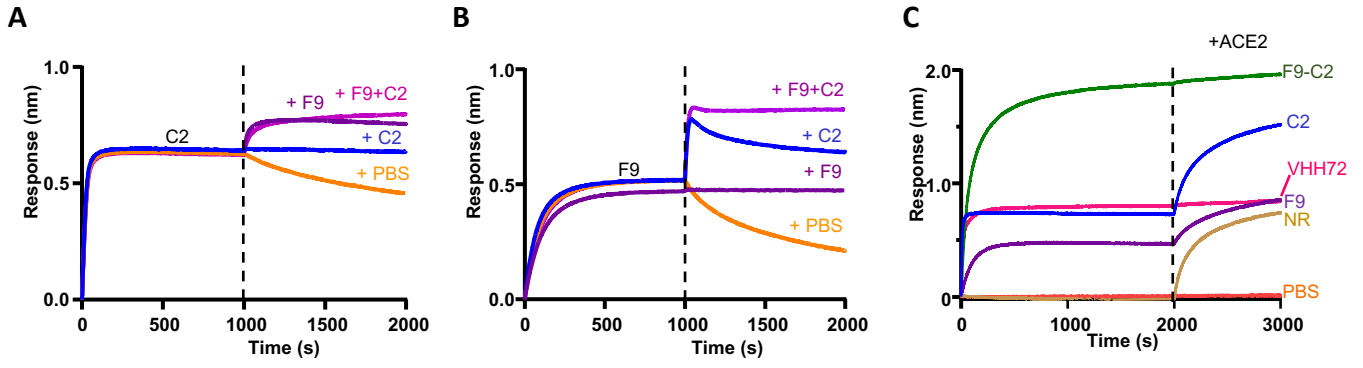

Figure 3

**A**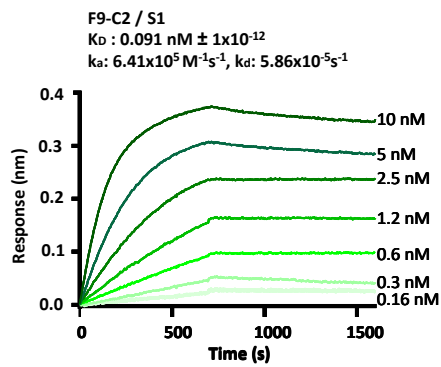**B**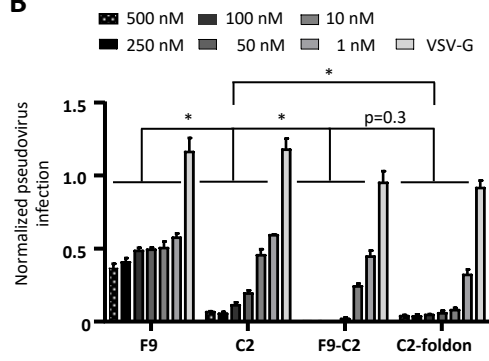**C**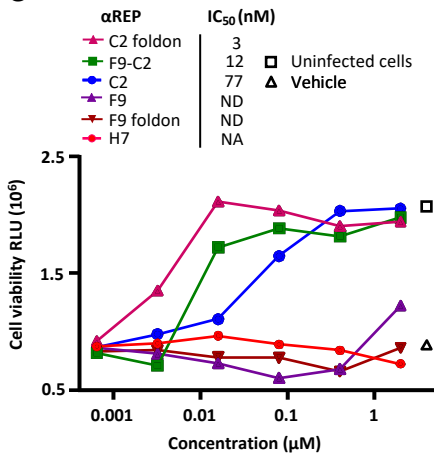**D**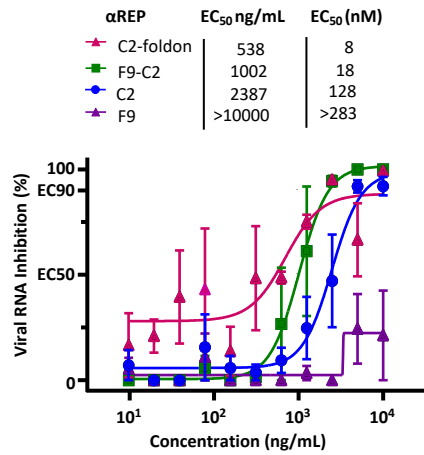

Figure 4

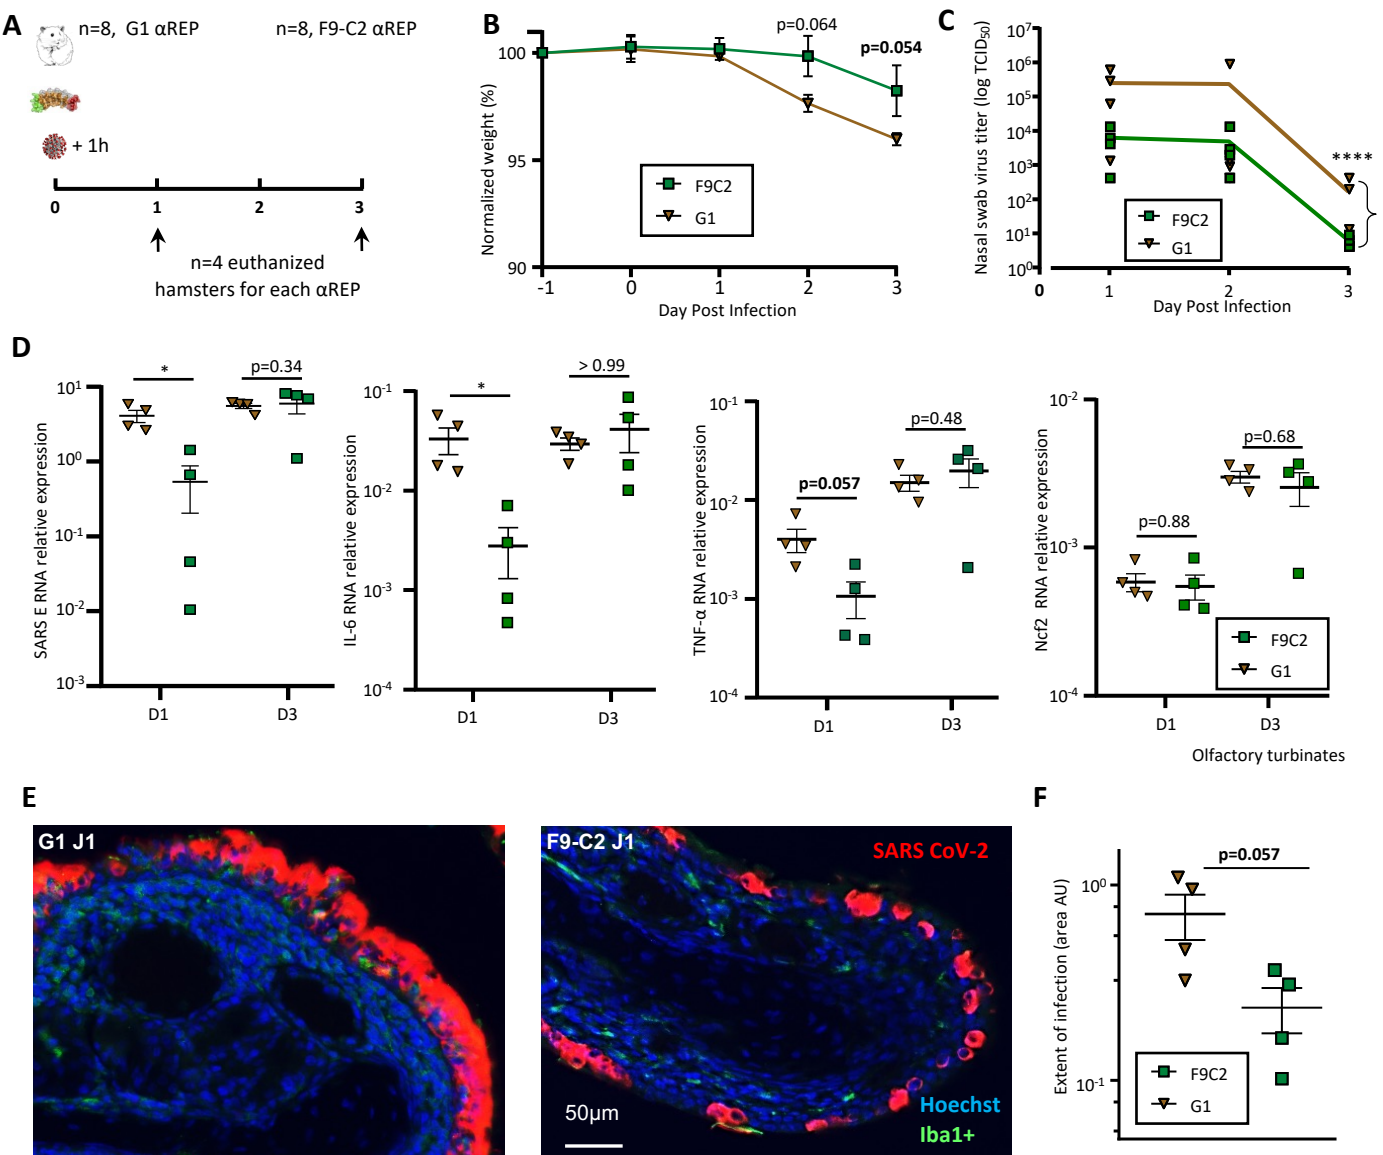

Figure 5

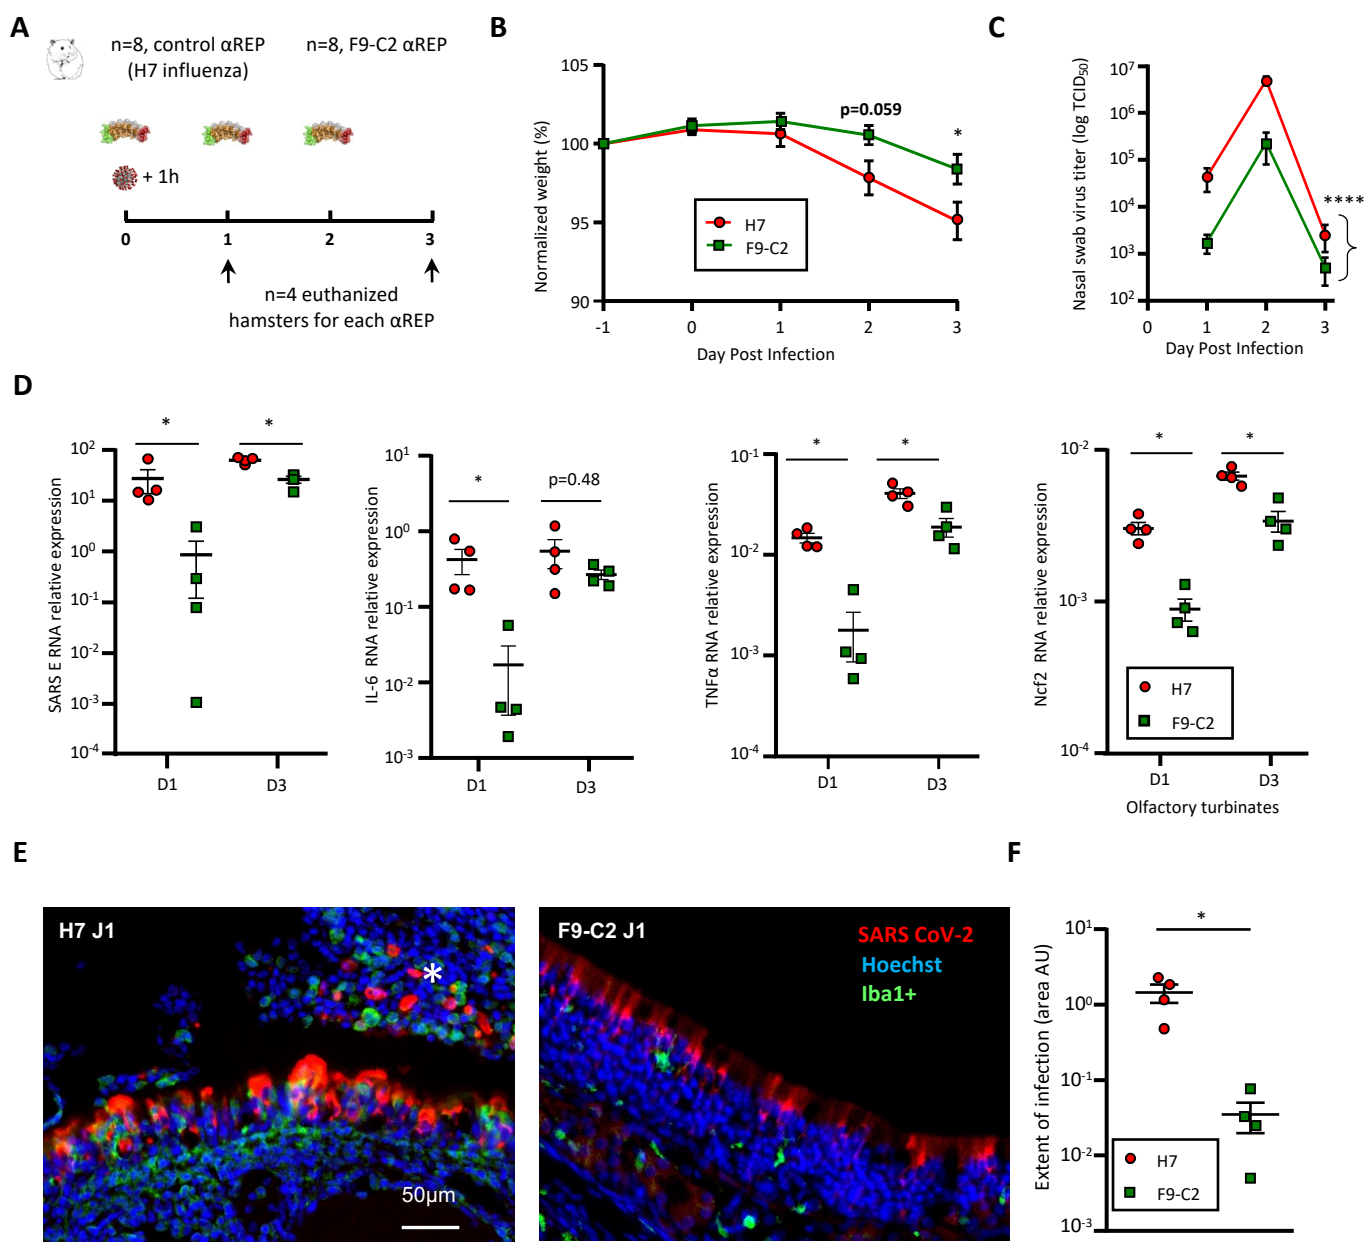

Figure 6



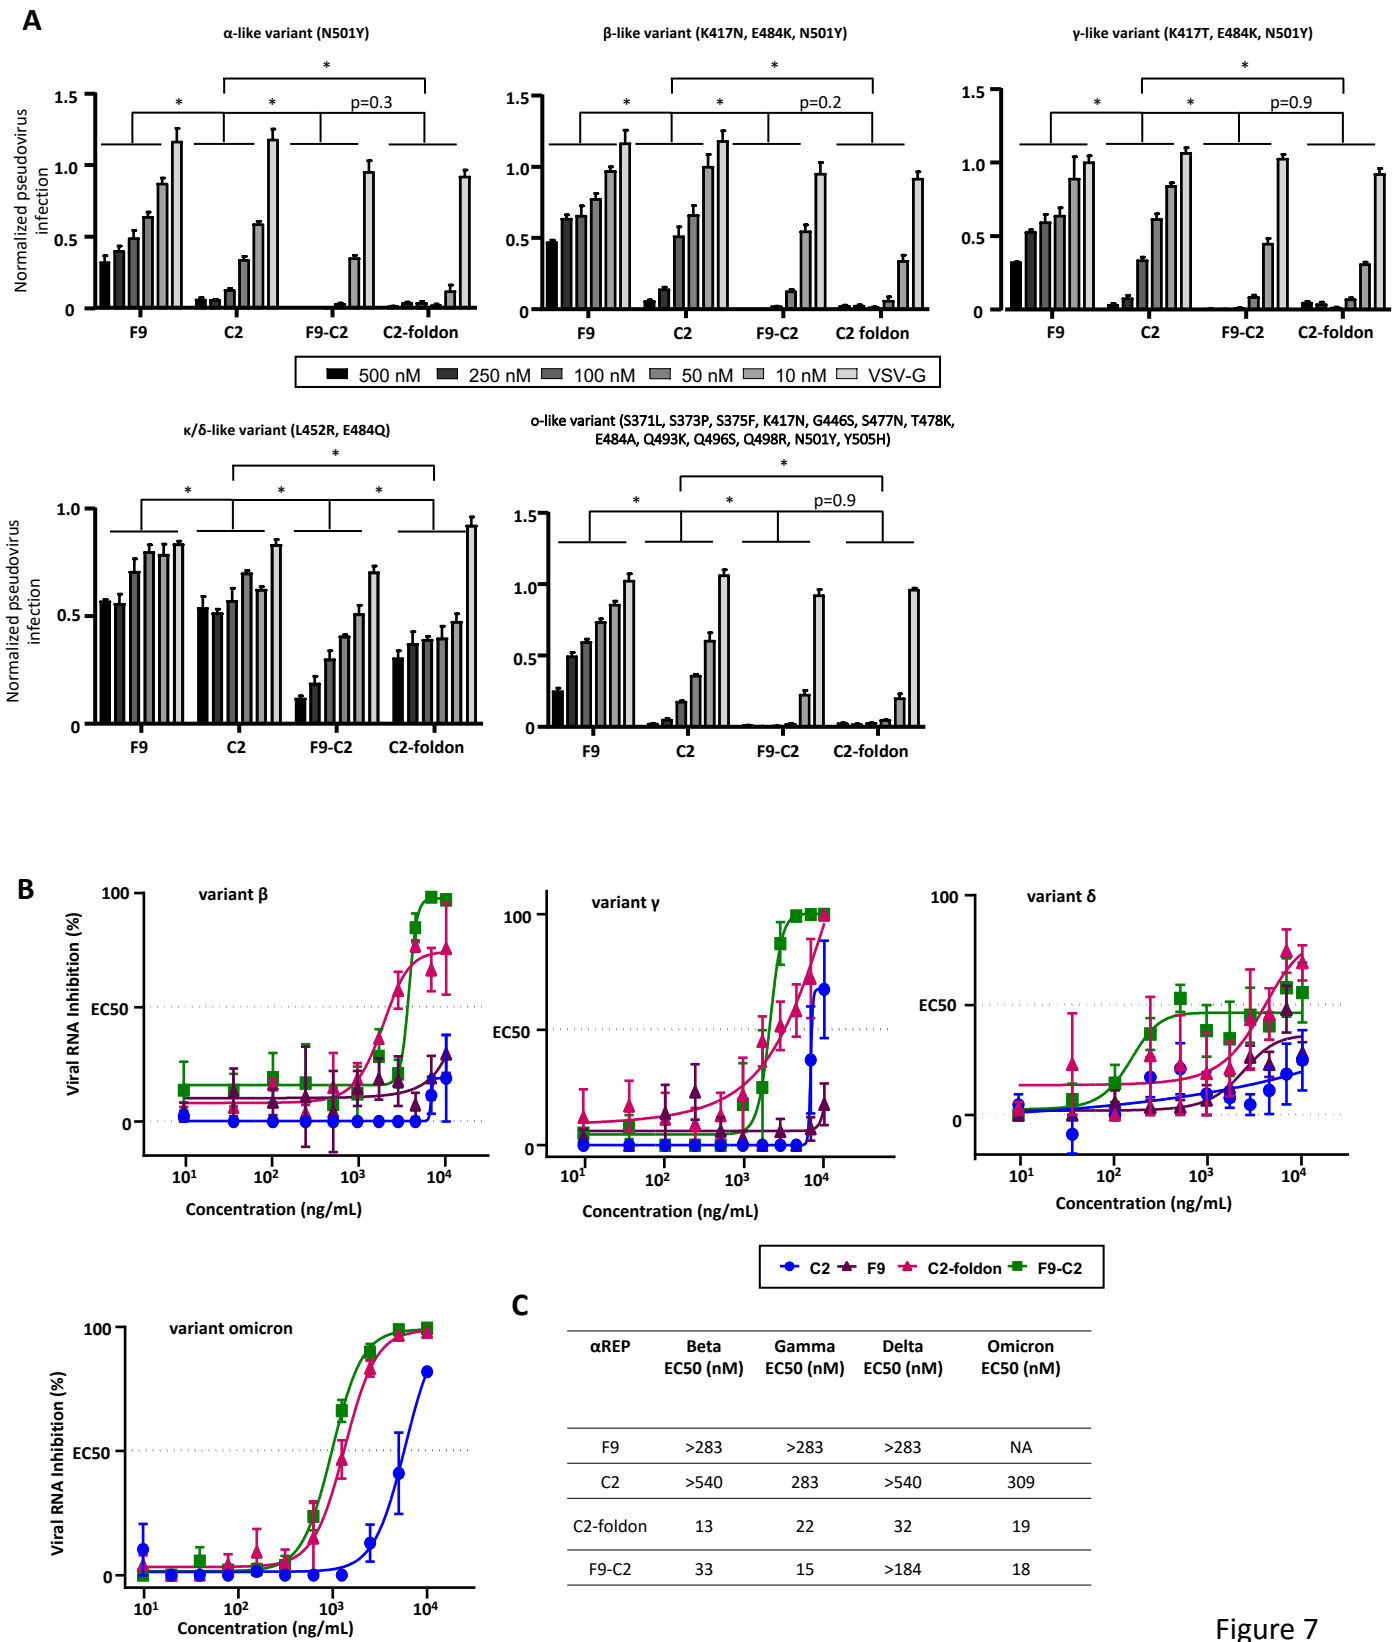

Figure 7

# Supplementary Figures

aRep design = N-ter domain – (31 amino acids long motif) x n – C-ter domain

>B1 (n = 4)

MRGSHHHHHH  
TDPEKVEYIKNLQDDSMGVRASAAFALGKI  
GDERAVEPLIKALKDEEDWLVLRQTAARALGQI  
GDERAVEPLIKALKDESDVRLSAAAALGGEI  
GDERAVEPLIKALKDEDPVRFSAAQALGEI  
GDERAVEPLIKALKDEDPVVRSSAASALGEI  
GGERVRAAMEKLAETGTGFARKVAVNYLETHKSLIS

>B4 (n = 2)

MRGSHHHHHH  
TDPEKVEYIKNLQDDSTQVRIDAAAALGKI  
GDERAVEPLIKALKDEDPAVRQSAAYALGQI  
GDERAVEPLIKALKDEDSNVRIEAAARALGQI  
GGERVRAAMEKLAETGTGFARKVAVNYLETHKSLIS

>B12 (n = 3)

MRGSHHHHHH  
TDPEKVEYIKNLQDDSLVRVIAAYALGKI  
GDERAVEPLIKALKDEDPDVRIRAAFALGQI  
GDERAVEPLIKALKDEDSAVRQSAEALGGEI  
GDERAVEPLIKALKDEEDGAVRETAASALGKI  
GGERVRAAMEKLAETGTGFARKVAVNYLETHKSLIS

>C1 (n = 5)

MRGSHHHHHH  
TDPEKVEYIKNLQDDSQTVRIVAANALGKI  
GDERAVEPLIKALKDEDPAVRQSAAGALGQI  
GDERAVEPLIKALKDEEDKNVRLNAATALGQI  
GDERAVEPLIKALKDEEDGYVRIRAAARALGGEI  
GDERAVEPLIKALKDEEDGYVRTAAAYALGKI  
GDERAVEPLIKALKDEEDRAVREAAAALGKI  
GGERVRAAMEKLAETGTGFARKVAVNYLETHKSLIS

>C2 (n = 3)

MRGSHHHHHH  
TDPEKVEYIKNLQDDSVKVRFFAAYALGKI  
GDERAVEPLIKALKDEEDANVRISAAAALGKI  
GDERAVEPLIKALKDEDAAVRQSAASALGQI  
GDERAVEPLIKALKDEEDENVRREAARALGQI  
GGERVRAAMEKLAETGTGFARKVAVNYLETHKSLIS\*

>C4 (n = 1)

MRGSHHHHHH  
TDPEKVEYIKNLQDDSVVPRDNAAVALGKI  
GDERAVEPLIKALKDEEDSRVRQRAAKALGKI  
GGERVRAAMEKLAETGTGFARKVAVNYLETHKSLIS

>C7 Nt\_seq (seq OK ; n = 3)

MRGSHHHHHH  
TDPEKVEYIKNLQDDSKIVRFFAAVALGKI  
GDERAVEPLIKALKDEEDTVRQTAATALGQI  
GDERAVEPLIKALKDEEDSTVRQAAAANALGKI  
GDERAVEPLIKALKDEEDENVRYSAASALGKI  
GGERVRAAMEKLAETGTGFARKVAVNYLETHKSLIS

>C12 (n = 3)

MRGSHHHHHH  
TDPEKVEYIKNLQDDSKIVRFFAAVALGKI  
GDERAVEPLIKALKDEEDTVRQTAATALGQI  
GDERAVEPLIKALKDEEDSTVRQAAAANALGKI  
GDERAVEPLIKALKDEEDENVRYSAASALGKI  
GGERVRAAMEKLAETGTGFARKVAVNYLETHKSLIS

>D3 (n = 3)

MRGSHHHHHH  
TDPEKVEYIKNLQDDSGLVRVIAAASALGKI  
GDERAVEPLIKALKDEEDTNVVRVAAAGALGQI  
GDERAVEPLIKALKDEEDPSVRQSAASALGKI  
GDERAVEPLIKALKDEEDVNVQRQAASALGKI  
GGERVRAAMEKLAETGTGFARKVAVNYLETHKSLIS

>D7 (n = 3)

MRGSHHHHHH  
TDPEKVEYIKNLQDDSGLVRVIAAASALGKI  
GDERAVEPLIKALKDEEDTNVVRVAAAGALGQI  
GDERAVEPLIKALKDEEDPSVRQSAASALGKI  
GDERAVEPLIKALKDEEDVNVQRQAASALGKI  
GGERVRAAMEKLAETGTGFARKVAVNYLETHKSLIS

>D10 (n = 8)  
MRGSHHHHHH  
TDPEKVEMYIKNLQDDSNSVRSSAADALGKI  
GDERAVEPLIKALKDEDPWVRETAAFALGQI  
GDERAVEPLIKALKDEDRYVRISAAAFALGKI  
GDERAVKPLIKALKDEDPVRSQAAEALGEI  
GDERAVEPLIKALKDEDAEVRIAAARALGEI  
GDERAVEPLIKALKDEDEGYVRLSAAKALGKI  
GDERAVEPLIKALKDEDEWVRFSAAEALGKI  
GDERAVEPLIKALKDEDEYVRRAAATLQGI  
GDERAVEPLIKALKDEDEVNVRYSAAIALGKI  
GGERVRAAMEKLAETGTGFARKVAVNYLETHKSLIS

>E6 (n = 3)  
MRGSHHHHHH  
TDPEKVEMYIKNLQDDSLVRYAAAAALGKI  
GDERAVEPLIKALKDEDPDVRIAAANALGQI  
GDERAVEPLIKALKDEDPVRSQAAAAALGKI  
GDERAVEPLIKALKDEDEVNVRLLAAEALGKI  
GGERVRAAMEKLAETGTGFARKVAVNYLETHKSLIS

>E12 (n = 7)  
MRGSHHHHHH  
TDPEKVEMYIKNLQDDSSNRFSAAFALGKI  
GDERAVEPLIKALKDEDEVNVRLLAALALGKI  
GDERAVEPLIKALKDEDSVVRVAAAVALGKI  
GDERAVEPLIKALKDEDAQVRLSAAALGKI  
GDERAVEPLIKALKDEDEGAVRASAAYALGEI  
GDERAVEPLIKALKDEDEGYVRARAALFALGKI  
GDERAVEPLIKALKDEDSVRLTAAKALGQI  
GDERAVEPLIKALKDEDLGVRYGAATALGEI  
GGERVRAAMEKLAETGTGFARKVAVNYLETHKSLIS

>F2 (n = 3)  
MRGSHHHHHH  
TDPEKVEMYIKNLQDDSKQVRYAADALGKI  
GDERAVEPLIKALKDEDTDVRLTAARALGKI  
GDEHAVEPLIKALKDEDAAVRQSAALGKI  
GDERAVEPLIKALKDEDEKNVRSEAAQALGEI  
GGERVRAAMEKLAETGTGFARKVAVNYLETHKSLIS

>F7 (n = 4)  
MRGSHHHHHH  
TDPEKVEMYIKNLQDDSLVRDDAADALGKI  
GDERAVEPLIKALKDEDEGEVRLSAAARALGEI  
GDERAVEPLIKALKDEDEGAVRRLAADALGKI  
GDERAVEPLIKALKDEDAAVRRLAALALGQI  
GDERAVEPLIKALKDEDEKNVRRVAAEALGQI  
GGERVRAAMEKLAETGTGFARKVAVNYLETHKSLIS

>F9 (n = 8)  
MRGSHHHHHH  
TDPEKVEMYIKNLQDDSVLRYNAAAFALGKI  
GDERAVEPLIKALKDEDRYVRFSAALALGEI  
GDERAVEPLIKALKDEDEGYVRASAAWALGQI  
GDERAVEPLIKALKDEDEWVRLSAAKALGKI  
GDERAVEPLIKALKDEDEGEVVRRAANALGKI  
GDERAVEPLIKALKDEDEGYVRRAAAGALGQI  
GDERAVEPLIKALKDEDEWVLRQSAATALGKI  
GDERAVEPLIKALKDEDPVRFSAALALGEI  
GDERAVEPLIKALKDEDEGFVRLSAAALGQI  
GGERVRAAMEKLAETGTGFARKVAVNYLETHKSLIS\*

>G1 (TIEDRI ; N = 2)  
MRGSHHHHHH  
TDPEKVEMYIKNLQDDSGTIEDR I  
GDERAVEPLIKALKDEDEGAVRQSAASALGQI  
GDERAVEPLIKALKDEDEGYVRQRAADALGKI  
GGERVRAAMEKLAETGTGFARKVAVNYLETHKSLIS\*

>G3 (n = 2)  
MRGSHHHHHH  
TDPEKVEMYIKNLQDDSGTIEDR I  
GDERAVEPLIKALKDEDSAVRMAAAVALGKI  
GDERAVEPLIKALKDEDEGFVRQRAAAALGKI  
GGERVRAAMEKLAETGTGFARKVAVNYLETHKSLIS

>G5 (n = 8)  
MRGSHHHHHH  
TDPEKVEMYIKNLQDDSAHVRNVAATALGKI  
GDERAVEPLIKALKDEDEWLVRSAAVALGKI  
GDERAVEPLIKALKDEDTDVRRAALALGKI  
GDERAVEPLIKALKDEDEVVRWRAAEALGKI  
GDERAVEPLIKALKDEDRYVRYAAALALGKI  
GDERAVEPLIKALKDEDEGYVRIAAASALGKI  
GDERAVEPLIKALKDEDPVRFSAARALGEI  
GDERAVEPLIKALKDEDAEVRREAALGKI  
GDERAVEPLIKALKDEDPVRYAAEALGEI  
GGERVRAAMEKLAETGTGFARKVAVNYLETHKSLIS

>H6 (n = 4)  
MRGSHHHHHH  
TDPEKVEMYIKNLQDDSQMVRFAASALGKI  
GDERAVEPLIKALKDEEDARVRQSAARALGKI  
GDERAVEPLIKALKDEDEVEVRMSAARALGQI  
GDERAVEPLIKALKDEDAVRQSAALALGKI  
GDERAVEPLIKALKDEDENVRQEAALGKI  
GGERVRAAMEKLAETGTGFARKVAVNYLETHKSLIS

>H10 (n = 7)  
MRGSHHHHHH  
TDPEKVEMYIKNLQDDSMVRSYAANALGKI  
GDERAVEPLIKALKDEDLAVRRAAATALGKI  
GDERAVEPLIKALKDEDSAVRQSAARALGQI  
GDERAVEPLIKALKDEDPVVRRAAAYALGQI  
GDERAVEPLIKALKDEDPVVRKTAEEALGKI  
GDERAVEPLIKALKDEDTNVRRAAALGKI  
GDERAVEPLIKALKDEDAEVRRAAVALGEI  
GDERAVEPLIKALKDEDSVRYGAAVALGQI  
GGERVRAAMEKLAETGTGFARKVAVNYLETHKSLIS

>H12 (n = 5)  
MRGSHHHHHH  
TDPEKVEMYIKNLQDDSGHVRVFAAYALGKI  
GDERAVEPLIKALKDEDSVRSIAANALGKI  
GDERAVEPLIKALKDEDSAVRQSAEALGKI  
GDERAVEPLIKALKDEDSNVRRAARALGQI  
GDERAVEPLIKALKDEDAVRKAAALALGKI  
GDERAVEPLIKALKDEDSVRYGAAVALGQI  
GGERVRAAMEKLAETGTGFARKVAVNYLETHKSLIS

>C2F9  
MRGSHHHHHHT  
DPEKVEMYIKNLQDDSVKVRFFAAYALGKI  
GDERAVEPLIKALKDEEDANVRISAAAALGKI  
GDERAVEPLIKALKDEDAVRQSAASALGQI  
GDERAVEPLIKALKDEDENVRREAARALGQI  
GGERVRAAMEKLAETGTGFARKVAVNYLETHKSLIS  
GGGGSGGGSGGGSGGGSGGGGG  
TDPEKVEMYIKNLQDDSVLVRYNAAFALGKI  
GDERAVEPLIKALKDEDRYVRFSAALALGEI  
GDERAVEPLIKALKDEDG YVRASAAWALGQI  
GDERAVEPLIKALKDEDRVRLSAAKALGKI  
GDERAVEPLIKALKDEDEGEVVRRAANALGKI  
GDERAVEPLIKALKDEDG YVRRAAAGALGQI  
GDERAVEPLIKALKDEDLVLRQSAATALGKI  
GDERAVEPLIKALKDEDPVRFSAALALGEI  
GDERAVEPLIKALKDEDFVRLSAAALGQI  
GGERVRAAMEKLAETGTGFARKVAVNYLETHKSLIS

>F9C2  
MRGSHHHHHHT  
TDPEKVEMYIKNLQDDSVLVRYNAAFALGKI  
GDERAVEPLIKALKDEDRYVRFSAALALGEI  
GDERAVEPLIKALKDEDG YVRASAAWALGQI  
GDERAVEPLIKALKDEDRVRLSAAKALGKI  
GDERAVEPLIKALKDEDEGEVVRRAANALGKI  
GDERAVEPLIKALKDEDG YVRRAAAGALGQI  
GDERAVEPLIKALKDEDLVLRQSAATALGKI  
GDERAVEPLIKALKDEDPVRFSAALALGEI  
GDERAVEPLIKALKDEDFVRLSAAALGQI  
GGERVRAAMEKLAETGTGFARKVAVNYLETHKSLIS  
GGGGSGGGSGGGSGGGSGGGGG  
TDPEKVEMYIKNLQDDSVKVRFFAAYALGKI  
GDERAVEPLIKALKDEEDANVRISAAAALGKI  
GDERAVEPLIKALKDEDAVRQSAASALGQI  
GDERAVEPLIKALKDEDENVRREAARALGQI  
GGERVRAAMEKLAETGTGFARKVAVNYLETHKSLIS

>C2-foldon  
MRGSHHHHHH T  
DPEKVEMYIKNLQDDSVKVRFFAAYALGKI  
GDERAVEPLIKALKDEEDANVRISAAAALGKI  
GDERAVEPLIKALKDEDAVRQSAASALGQI  
GDERAVEPLIKALKDEDENVRREAARALGQI  
GGERVRAAMEKLAETGTGFARKVAVNYLETHKSLIS  
GSAGSAGSGGAGGSGYIPEAPRDGQAYVRKDG EWVLLSTFL

>F9-foldon  
MRGSHHHHHH TDPEKVEMYIKNLQDDSVLVRYNAAFALGKI  
GDERAVEPLIKALKDEDRYVRFSAALALGEI  
GDERAVEPLIKALKDEDG YVRASAAWALGQI  
GQIGDERAVEPLIKALKDEDRVRLSAAKALGKI  
GKIGDERAVEPLIKALKDEDEGEVVRRAANALGKI  
GKIGDERAVEPLIKALKDEDG YVRRAAAGALGQI  
GQIGDERAVEPLIKALKDEDLVLRQSAATALGKI  
GKIGDERAVEPLIKALKDEDPVRFSAALALGEI  
GEIGDERAVEPLIKALKDEDFVRLSAAALGQI  
GQIGDERVRAAMEKLAETGTGFARKVAVNYLETHKSLIS  
GSAGSAGSGGAGGSGYIPEAPRDGQAYVRKDG EWVLLSTFL

Figure S1

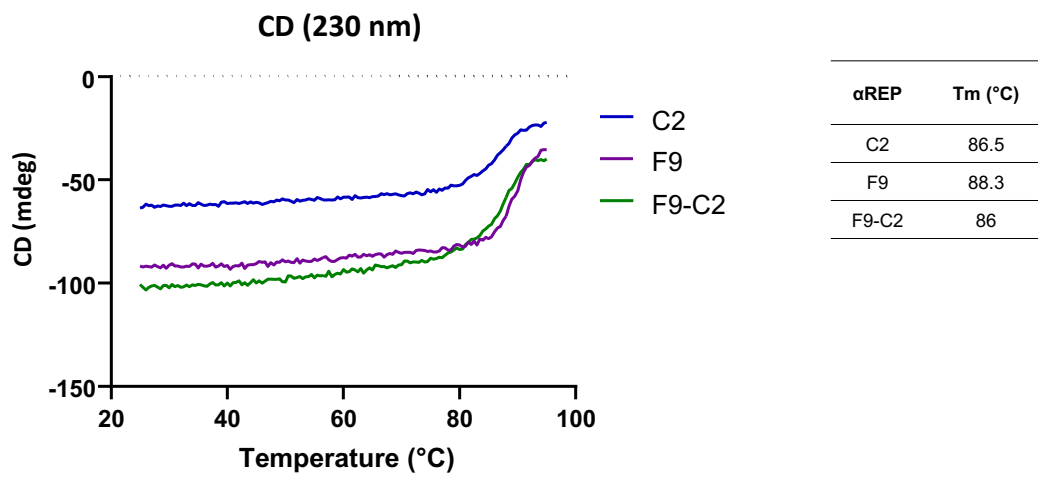

Figure S2

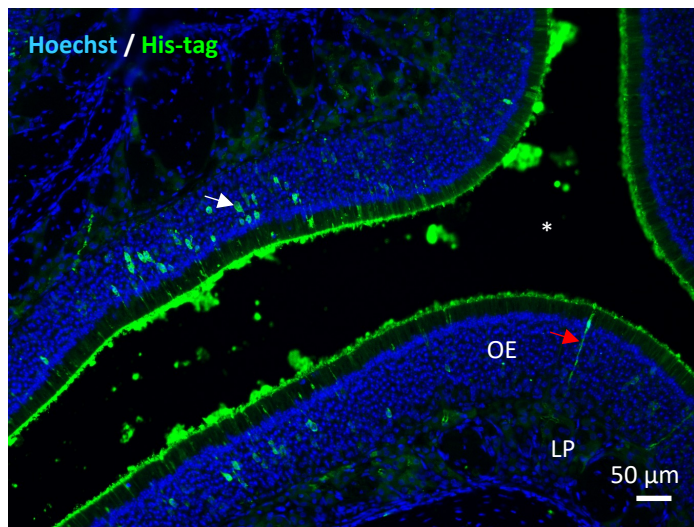

Figure S3

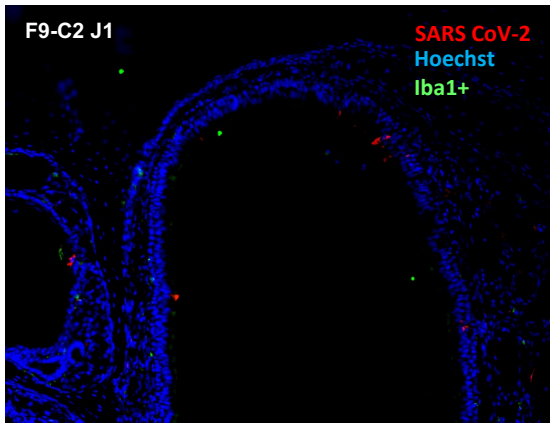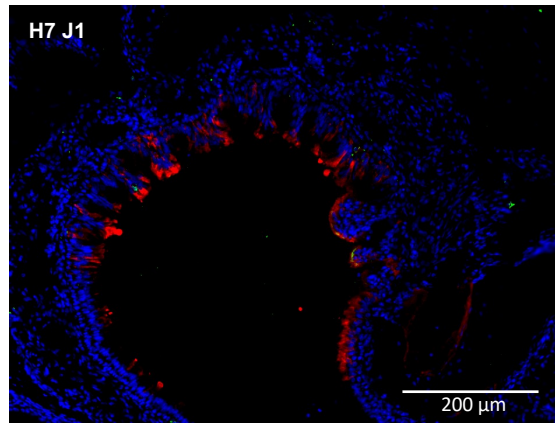

Figure S4
